# Supplementary material
Source: PubMed Central journal article supplement (PMC4657560)
Supplement: NIHMS633379-supplement-1.pdf [file NIHMS633379-supplement-1.pdf]

## Supplemental procedures

**Figure S1, related to Figure 1.** miR-155 is required for activated T cell expansion in *Mir146a*<sup>-/-</sup> mice.

**Figure S2, related to Figure 2.** Tfh and GC B cell populations in Wt, *Mir155*<sup>-/-</sup>, *Mir146a*<sup>-/-</sup> and DKO mice.

**Figure S3, related to Figure 3.** H&E staining and IHC of Wt, *Mir155*<sup>-/-</sup>, *Mir146a*<sup>-/-</sup> and DKO mice.

**Figure S4, related to Figure 4.** Validation of ES cell clones with a “floxed” miR-155 allele.

**Figure S5, related to Figures 4 and 5.** T cell-intrinsic role for miR-155 during Tfh cell development.

**Figure S6, related to Figure 6.** miR-155 targets in Tfh cells.

**Figure S7, related to Figure 7.** T cell-specific expression of miR-155 is required for activation of CD4<sup>+</sup> T cells and spontaneous accumulation of Tfh cells in *Mir146a*<sup>-/-</sup> mice.

**Supplemental Table S1, related to Figure 4.** Sequence of the Floxed mouse BIC allele (Homology arms in green, conditional knockout region in red. LoxP sites underlined. Frt sites in italics. Exons are bolded).

**Supplemental Table S2, related to Figure 6.** miR-155 targets in Tfh cells.

**Supplemental Table S3, related to Figure 6.** miR-155 targets in middle aged CD4<sup>+</sup> T

cells.

**Supplemental Table S4, related to Figure 6.** shRNA targeting sequences and quantitative PCR (qPCR) Primers.
