# Supplementary material
Source: PubMed Central journal article supplement (PMC4657560)
Supplement: NIHMS633379-supplement-2.pdf [file NIHMS633379-supplement-2.pdf]

## Supplemental Procedures

### Mice

All mice used in the study are on a C57BL/6 genetic background. *Mir155*<sup>fl/fl</sup> mice were created by Taconic by introducing loxP sites upstream and downstream of the miR-155 producing exon of *BIC* (schematics and sequence information in **Figure 4, S4** and **Table S1**). In brief, 30 µg of NotI-linearized final targeting vector DNA was electroporated into  $\sim 10^7$  C57BL/6 ES cells and selected with 200 mg/ml G418. Two plates of G418 resistant ES clones ( $\sim 192$ ) were selected for screening. The primary ES screening was performed with 3' PCR and distal LoxP PCR. Approximately twenty potential targeted clones were identified from one plate. Six clones were expanded for further analysis. Upon completion of the ES clone expansion, additional Southern and PCR confirmation analysis was performed. Based on this analysis, all six expanded clones were confirmed for homologous recombination with single neo integration. Flp electroporations were performed on two clones. Two Neo deleted clones were identified and confirmed by PCR upon expansion (**Figure S4**).

### Histological analyses

Spleen, liver and kidney samples were placed in a 10% formalin solution immediately after harvesting, fixed for 24 hours, rinsed in PBS and placed in 70% ethanol.

### Flow Cytometry

Fluorophor-conjugated antibodies against CD45.1, CD45.2, CD11b, Gr1, CD4, CD3ε, CD8, CD62L, Icos, CD44 and CD69 (all from Biolegend) were used to stain RBC-

depleted splenocytes, LN cells, BM cells and peripheral blood cells. Germinal center B cells were identified by staining with antibodies against GL7 (ebioscience), FAS (BD Pharmagen), IgD (Biolegend) and B220 (Biolegend). The Tfh cells were identified by staining with antibodies against CD3 $\epsilon$ , CD4, CXCR5 (ebioscience) and PD-1 (Biolegend), or CD3 $\epsilon$ , CD4, Icos, PD-1 and Bcl6 (BD Pharmagen), and gating based on isotype or unstained controls.

### **ELISAs**

Briefly, serum samples were added in a 5-fold serial dilution onto plates pre-coated with 4  $\mu$ g/ml Ova. After incubation and washing, biotinylated anti-mouse IgG or IgG1 antibodies (SouthernBiotech) were added and incubated for 2 hrs at room temperature followed by 1 hr of Streptavidin-HRP (SouthernBiotech) incubation. Detection reagent and stop solution (eBioscience) were added according to the manufacturer's instructions, and the signal detected using a plate reader.

### **RNA Sequencing**

For the RNA-seq experiments, CD3 $\epsilon$ <sup>+</sup>CD4<sup>+</sup> T cells were FACS sorted (using a BD FACSAria II) from the spleens of 10 months old mice of the indicated genotypes. In a separate experiment, CD4<sup>+</sup> T cells were first purified from both Wt and *Mir155*<sup>-/-</sup> mouse spleens on day 8 post Ova-immunization by using a CD4<sup>+</sup> T cell negative selection kit (Miltenyi). CD4<sup>+</sup>CXCR5<sup>+</sup>PD1<sup>+</sup> Tfh and CD4<sup>+</sup>CXCR5<sup>-</sup>PD1<sup>-</sup> non-Tfh cells were FACS sorted from Wt and *Mir155*<sup>-/-</sup> CD4<sup>+</sup> T cells (n=7 for each genotype per sample).

For the reference generation, Ensembl transcript annotations for mm10 were downloaded from the UCSC table browser (release 73). Gene annotations were created by merging transcripts with the same gene identifier using the USeq (v8.8.7) MergeUCSCGeneTable application. All possible splice junction sequences from each gene's transcripts were generated with the USeq (v8.8.7) MakeTranscriptome application using a radius of 46. These splice junction sequences were added to standard mm10 chromosome sequences and run through novoindex (v2.8) to create the transcriptome reference index.

For the RNA-Seq analyses, reads were aligned to the transcriptome reference index described above using Novoalign (v2.08.01), allowing up to 50 alignments for each read. The USeq (v8.8.7) SamTranscriptomeParser application was used to select the best alignment for each read and to convert the coordinates of reads aligning to splices back to genomic space. Differential gene expression was measured using the USeq (v8.8.3) DefinedRegionDifferentialSeq (DRDS) application, modified to report non-variance stabilized log<sub>2</sub> ratios. Briefly, DRDS first determines the numbers of reads aligning to each gene annotation. DRDS then calls DESeq (v1.12.1), which normalizes the signal and determines differential expression.

### **Immunoblotting**

CD4<sup>+</sup> T cells were isolated from mouse spleens using a CD4<sup>+</sup> T cell negative selection kit (Miltenyi). Cells were cultured in complete RPMI supplemented with plate-bound αCD3ε (5 μg/ml) and soluble αCD28 (2 μg/ml) for activation. RIPA buffer (50 mM Tris-HCl pH 7.4, 1% Nonidet P40, 150 mM NaCl, 1 mM EDTA, 10% sodium deoxycholate,

freshly added with 1 mM phenylmethylsulphonyl fluoride (PMSF), 1 mM Na<sub>3</sub>VO<sub>4</sub> and 1 mM NaF) was used for lysis. Extract was used for Immunoblotting.

### **Ova Immunization**

Eight days after immunization, mice were sacrificed and analyzed individually. Another group of mice was bled on days 14, 21 and 28 to detect Ova-specific total IgG or IgG1 antibodies. Mice were boosted on day 21 with Ova in PBS.

**Figure S1, related to Figure 1**

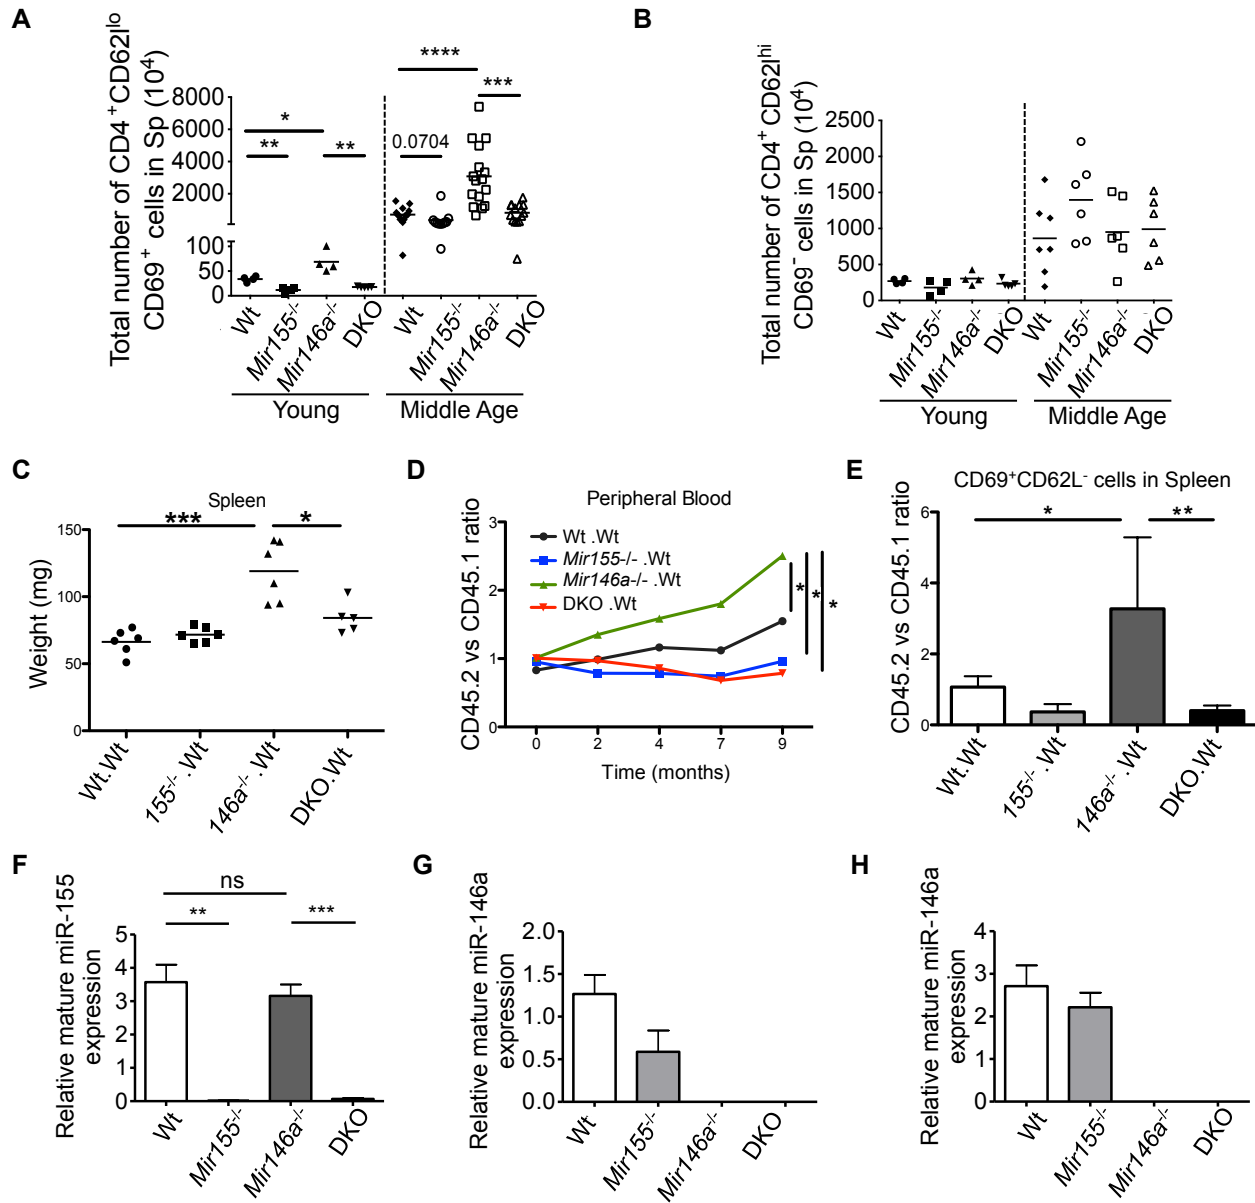

**Figure S1, related to Figure 1. miR-155 is required for activated T cell expansion in *Mir146a*<sup>-/-</sup> mice.** (A-B) Number of activated (CD69<sup>+</sup>CD62L<sup>lo</sup>) or naïve (CD69<sup>-</sup>CD62L<sup>hi</sup>) CD4<sup>+</sup> T cells in spleens from young and middle-aged mice. (C) Measured spleen weights at time of necropsy (10 months) following BM reconstitution with the indicated genotypes. (D) The ratio of CD45.2 (Wt or experimental BM) to CD45.1 (Wt control BM) WBCs in the peripheral blood of reconstituted mice were measured via flow cytometry at 0, 2, 4, 7, and 9 months of age. (E) CD45.2/CD45.1 ratio of activated CD4<sup>+</sup> T cells (CD62L<sup>-</sup> and CD69<sup>+</sup>) in the spleens of 10-month old recipients. (F-H) Relative expression of mature miR-155 (F) and miR-146a in sorted B220<sup>+</sup> B cells (H), or miR-146a in sorted CD4<sup>+</sup> T cells (G), from the spleens of middle-aged mice.

Figure S2, related to Figure 2

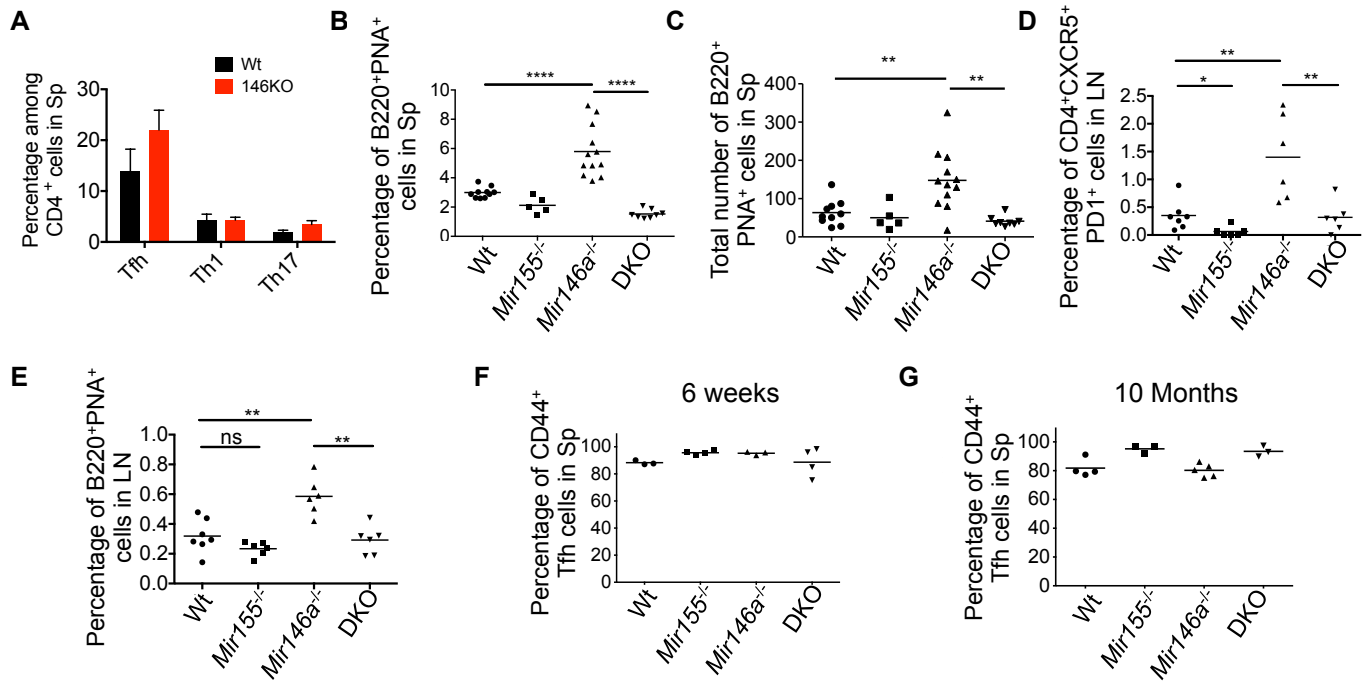

**Figure S2, related to Figure 2. Tfh and GC B cell populations in Wt, *Mir155*<sup>-/-</sup>, *Mir146a*<sup>-/-</sup> and DKO mice. (A)** Average percentage of Tfh, Th1 and Th17 cells in middle-aged mice of the indicated genotypes as assessed by intracellular staining. **(B)** Average percentage of PNA<sup>+</sup> GC B cells in middle-aged spleens. **(C)** Average total number of PNA<sup>+</sup> GC B cells in middle-aged spleens. **(D)** Average percentage of Tfh cells in middle-aged LNs. **(E)** Average percentage of PNA<sup>+</sup> GC B cells in middle-aged LNs. **(F)** Average percentage of CD44<sup>+</sup> Tfh cells in young mice. **(G)** Average percentage of CD44<sup>+</sup> Tfh in middle-aged mice.



Figure S3, related to Figure 3

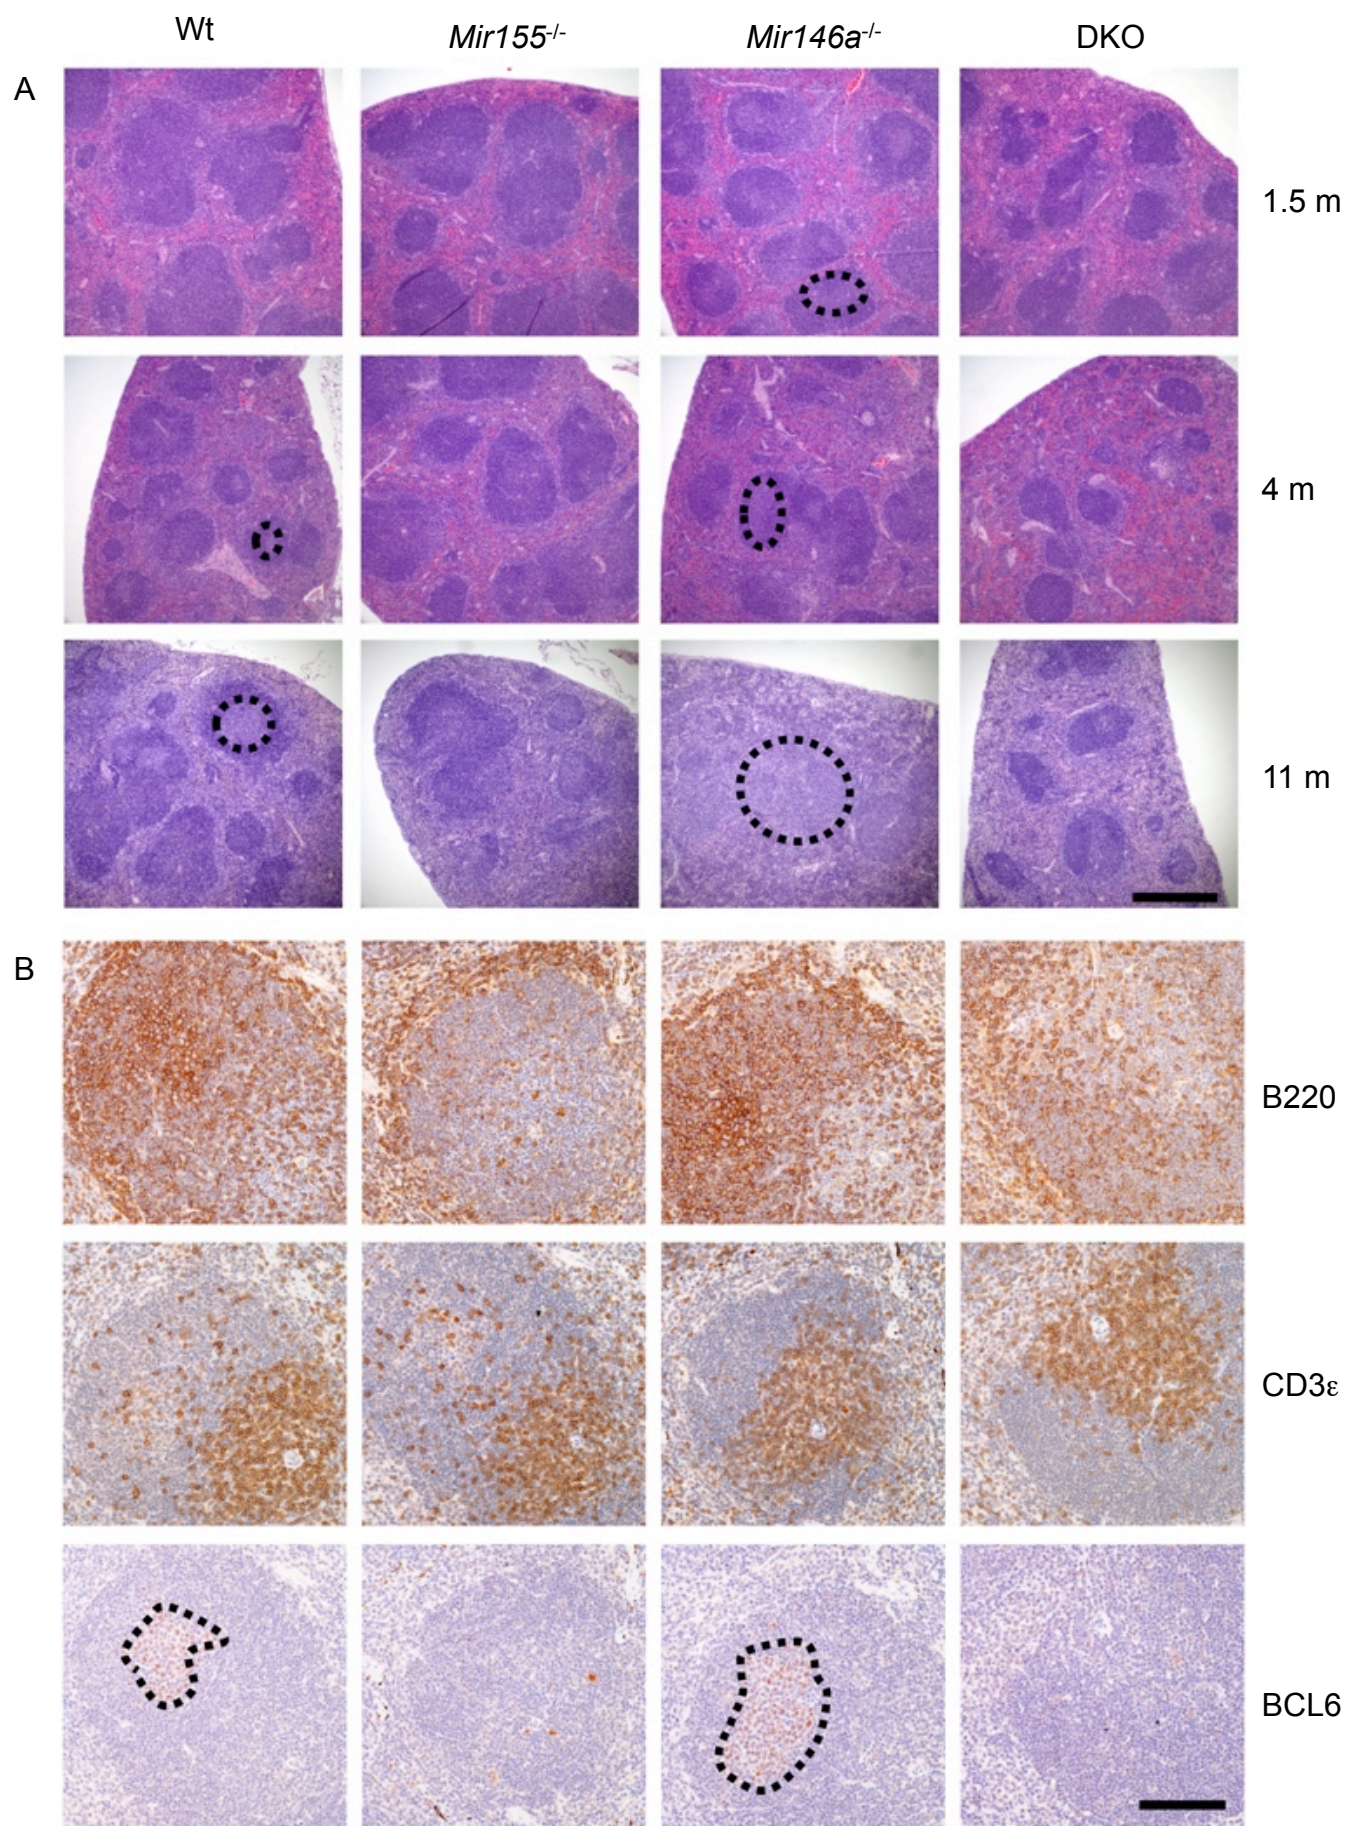

**Figure S3, related to Figure 3. H&E staining and IHC of Wt, *Mir155*<sup>-/-</sup>, *Mir146a*<sup>-/-</sup> and DKO mice.** (A) Representative H&E staining of spleen sections from mice at the indicated ages (m=months). Examples of regions with germinal centers are indicated with a broken line. Scale bar: 400 microns. (B) Representative staining with the indicated antibodies on spleen sections from 1.5 months old mice of the indicated genotypes. Examples of regions with BCL6 staining are highlighted. Scale bar: 100 microns.

**Figure S4, related to Figure 4**

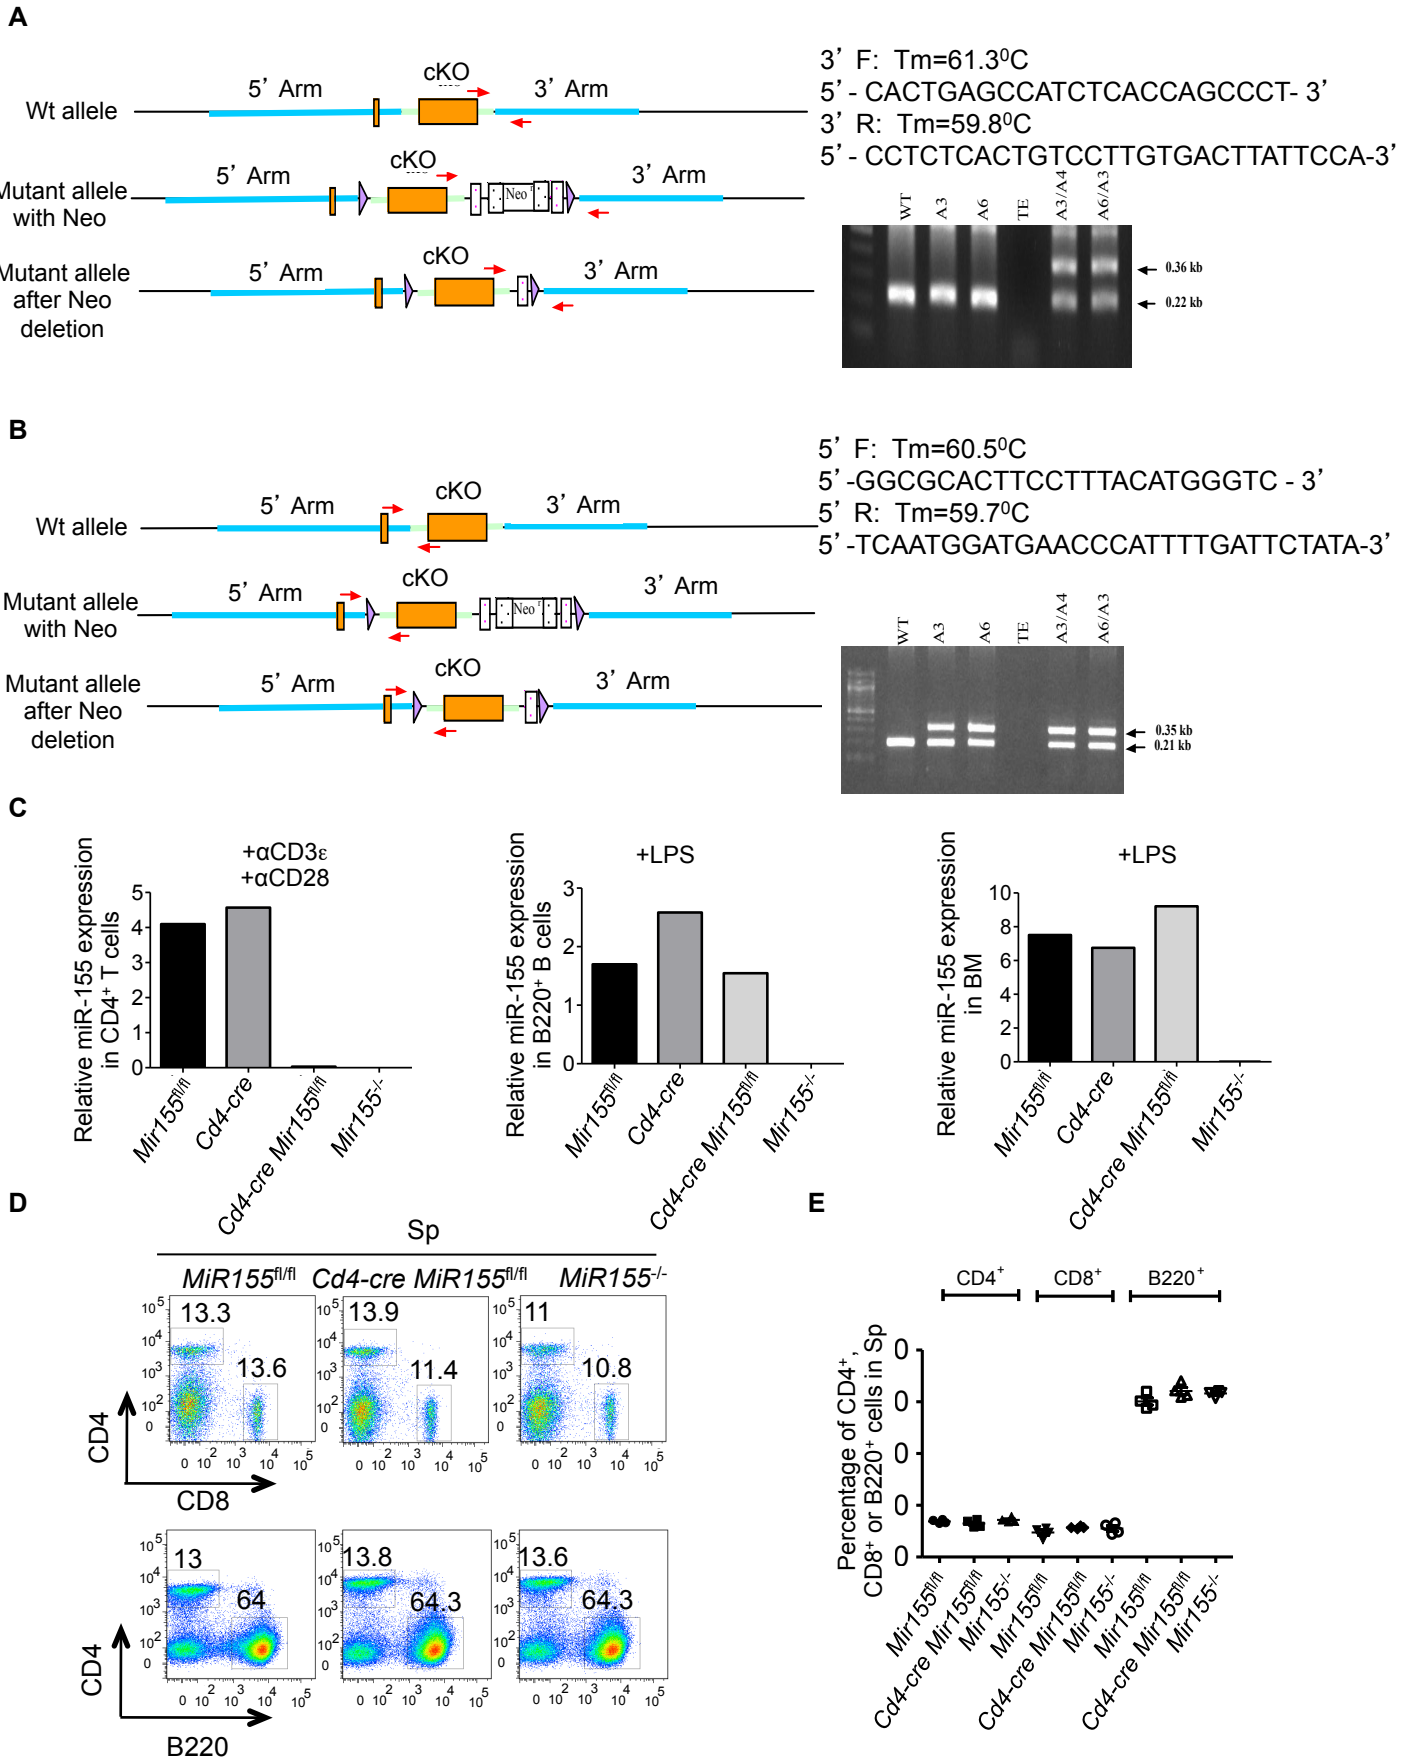

**Figure S4, related to Figure 4. Validation of ES cell clones with a “floxed” miR-155 allele.** (A) Schematic of the floxed miR-155 allele and location of primers used to genotype the 3' loxP site. Primer sequences used for PCR and an agarose gel demonstrating Wt vs. Mutant alleles are shown. A3 and A6 are two independent ES cell clones before removal of Neo, while A3/A4 and A6/A3 are clones after removal of Neo. (B) Same as in (A) but using primers that flank the 5' loxP site. Primers that amplify the 5' loxP site were used for genotyping. (C) CD4<sup>+</sup> T, B220<sup>+</sup> B and bone marrow cells were isolated from the indicated mice and activated by anti-CD3 $\epsilon$ +anti-CD28 antibodies or LPS, as indicated. 24 hrs later, RNAs were extracted and subjected to QPCR analyses to quantify mature miR-155 expression. Expression values have been normalized to 5S values. (D) FACS plots showing the percentage of CD4<sup>+</sup>, CD8<sup>+</sup> and B220<sup>+</sup> cells in indicated mouse spleens. (E) Average percentages of CD4<sup>+</sup>, CD8<sup>+</sup> and B220<sup>+</sup> cells in the indicated mouse spleens.

**Figure S5, related to Figure 4 and 5**

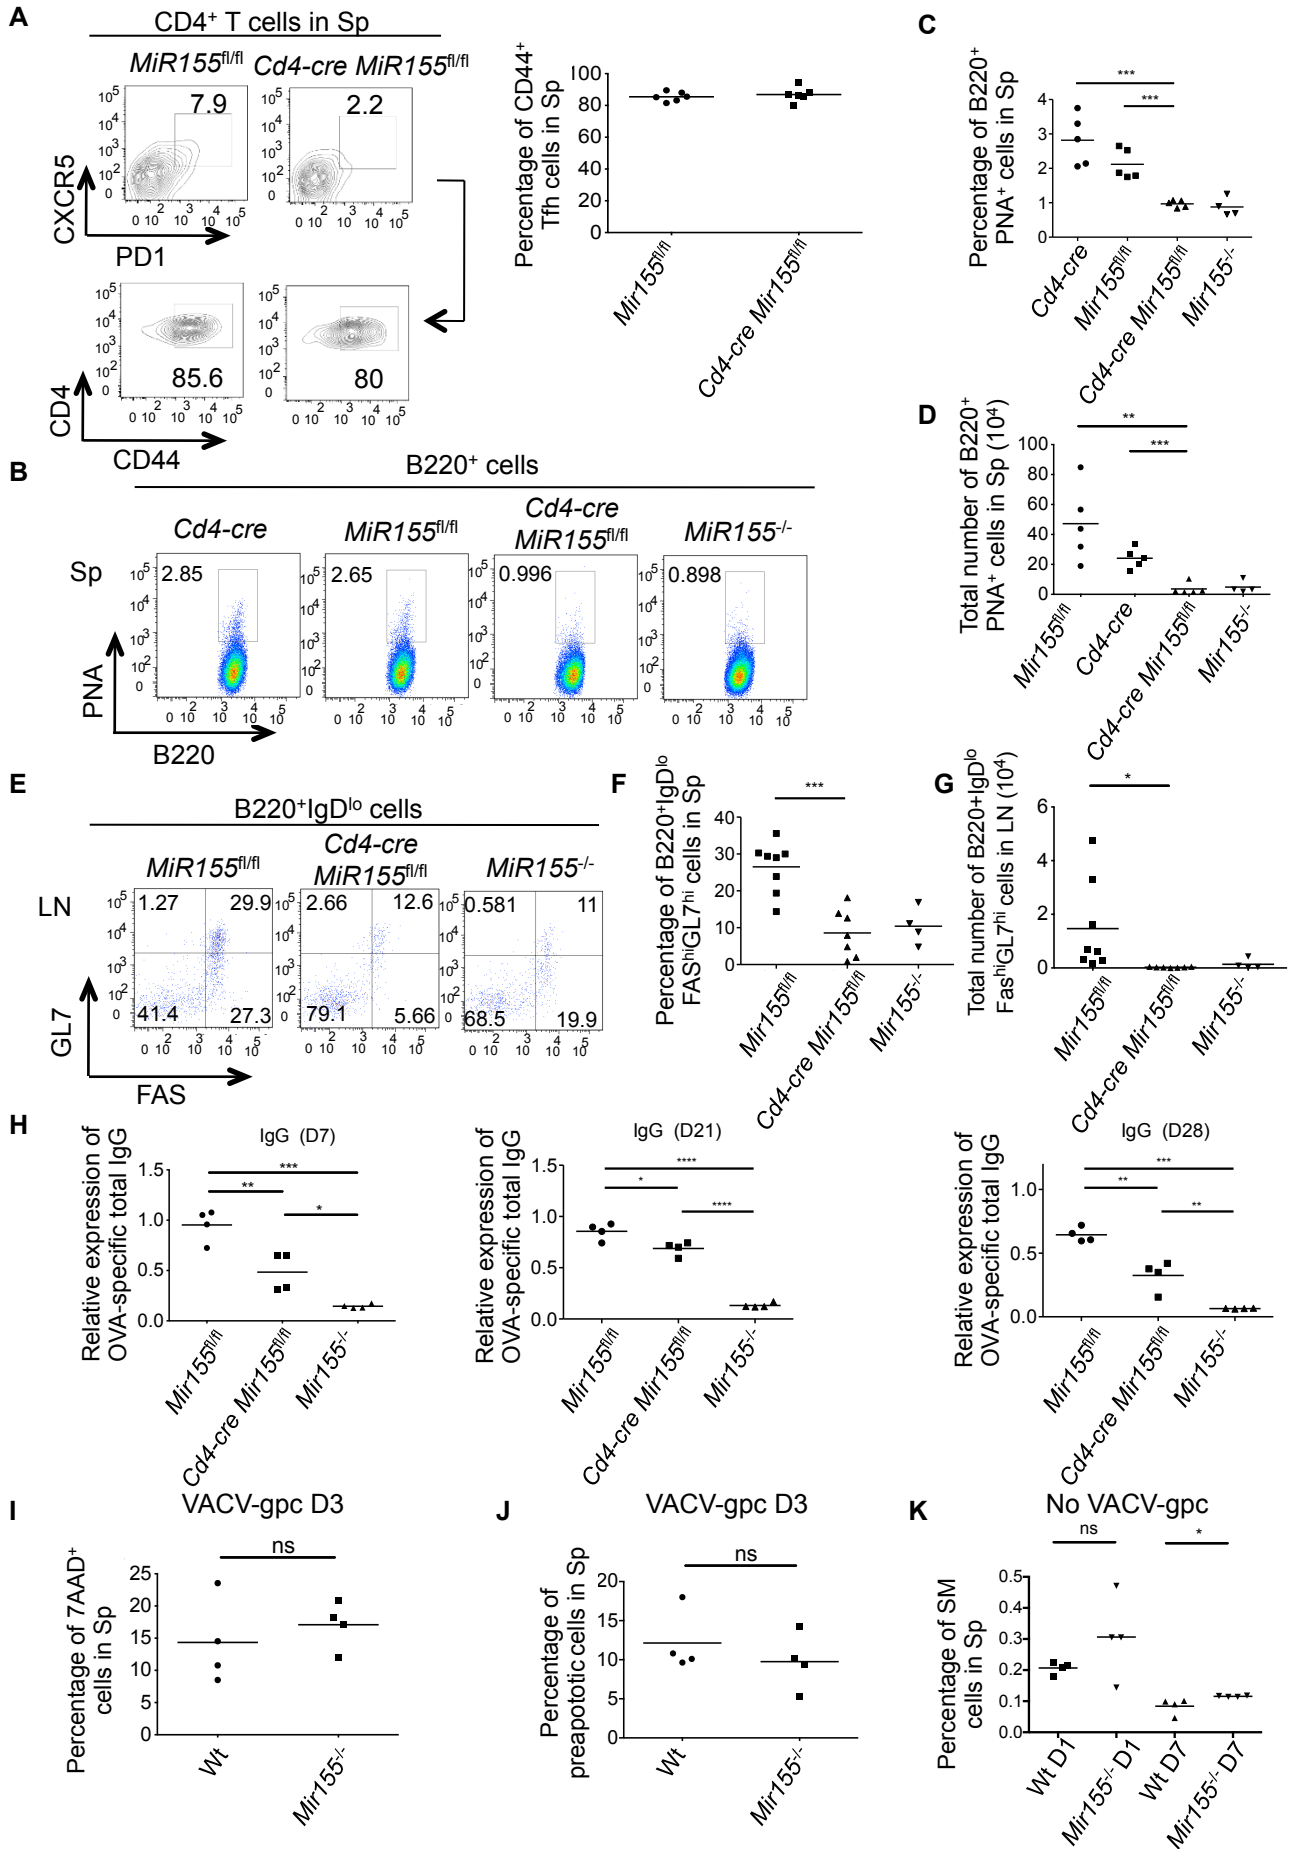

**Figure S5, related to Figures 4 and 5. T cell-intrinsic role for miR-155 during Tfh cell development.** (A-H) T cell-specific expression of miR-155 is required for proper antigen-specific responses by GC B cells. Mice were immunized with Ova in CFA for 8 days and then harvested. (A) FACS plots showing CD44 staining of Tfh cells from the indicated mouse spleens. Right panel shows the average percentage of CD44<sup>+</sup> cells among Tfh cells in mouse spleens. (B) FACS plots showing PNA staining of GC B cells in indicated mouse spleens. (C) Average percentage of PNA<sup>+</sup> cells in mouse spleens. (D) Average total number of PNA<sup>+</sup> cells in mice spleens. (E) FACS plots showing staining of GC B cells in LNs from the indicated genotypes. (F) Average percentage of GC B cells in mouse LNs. (G) Average total number of GC B cells in mouse LNs. (H) ELISA of relative concentrations of Ova-specific IgG antibody in the serum of Ova immunized mice from indicated time points. (I) Average percentage of Wt and *Mir155*<sup>-/-</sup> 7AAD<sup>+</sup>CD4<sup>+</sup> SM T cells in the indicated mouse spleens 3 days after VACV-gpc infection. (J) Average percentage of Wt and *Mir155*<sup>-/-</sup> AnnexinV<sup>+</sup>7AAD<sup>-</sup>CD4<sup>+</sup> SM T cells in the indicated mouse spleens 3 days after VACV-gpc infection. (K) Average percentage of SM cells in mouse spleens after adoptive transfer for the indicated periods of time.

**Figure S6, related to Figure 6**

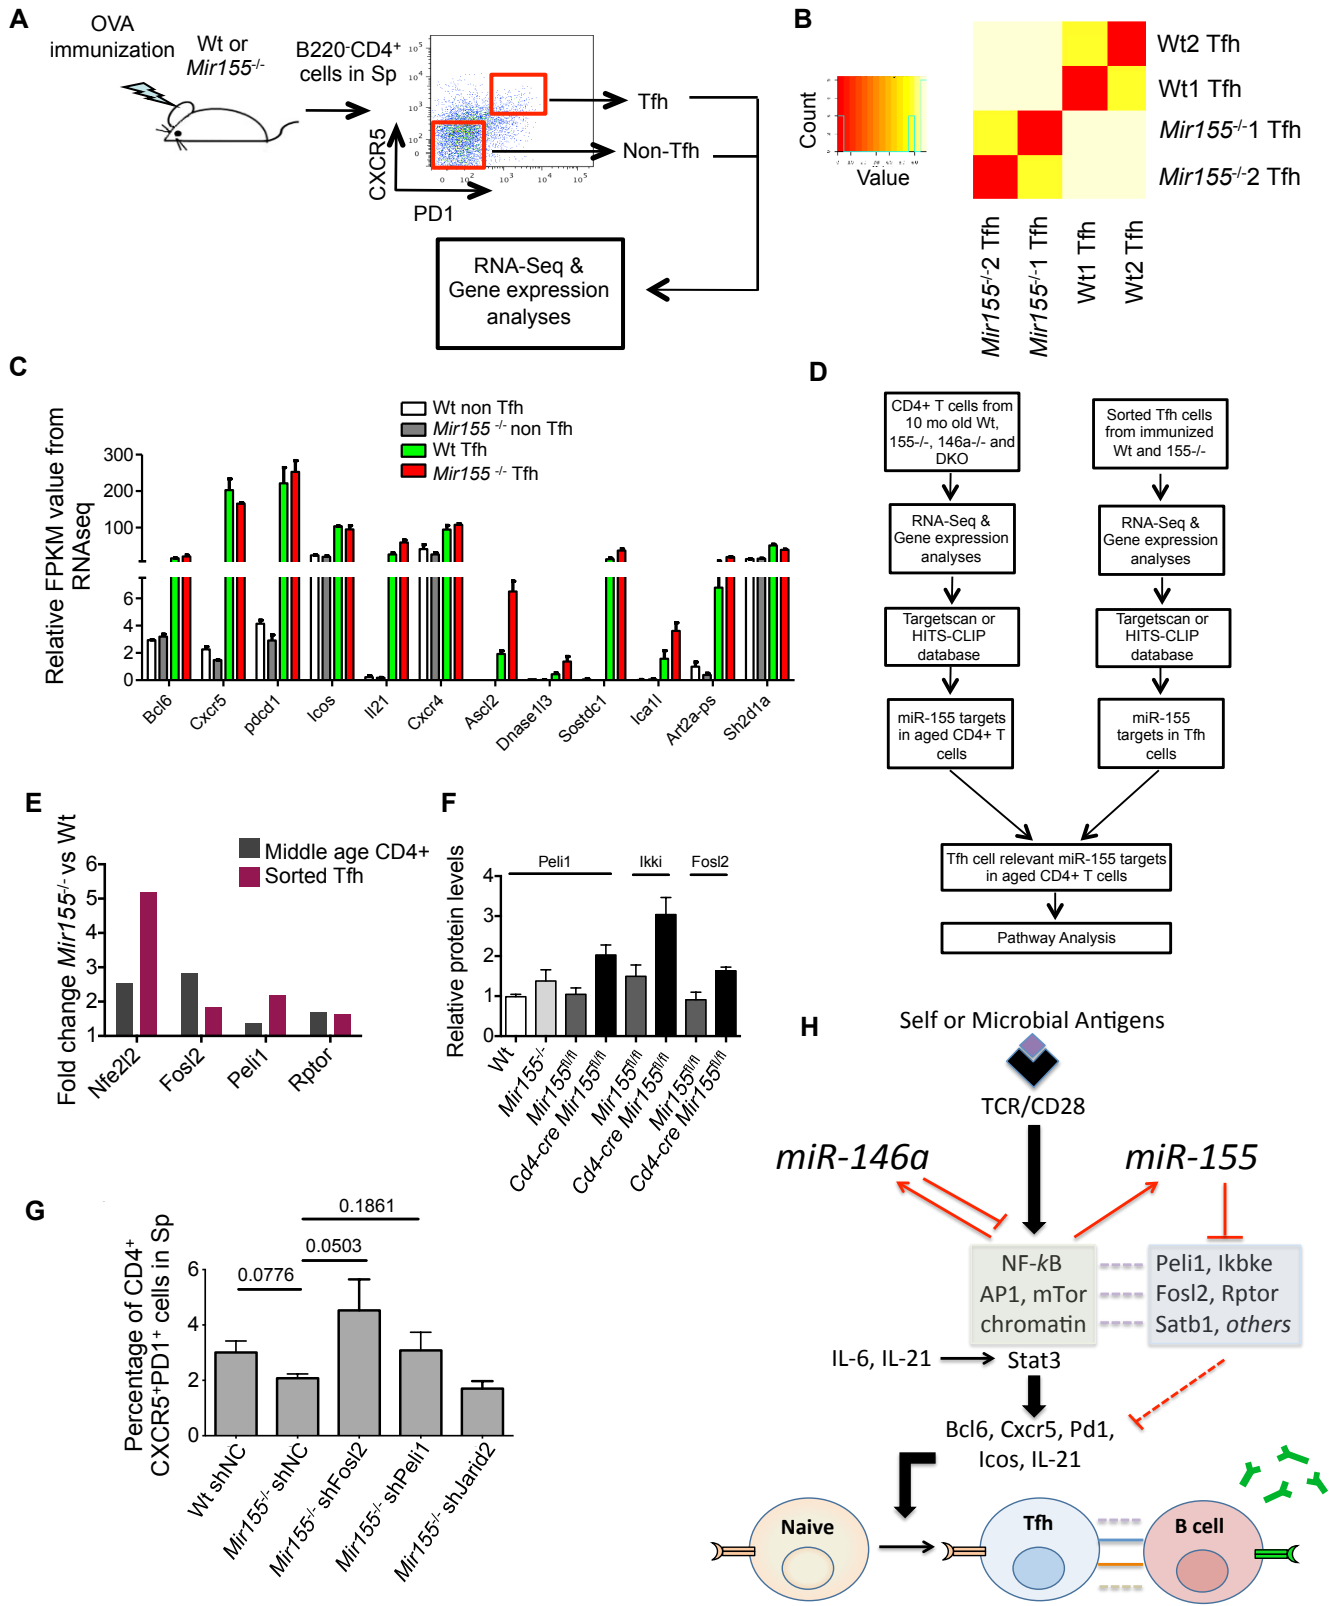

**Figure S6, related to Figure 6. miR-155 targets in Tfh cells.** (A) Schematic diagram showing the sorting of Tfh cells from immunized Wt and *Mir155*<sup>-/-</sup> mice. RNAs were extracted from indicated cell populations and subjected to RNA-Seq. (B) Gene clustering of RNA-Seq data is shown. The magnitude of the gene expression differences between any two groups is indicated by color, and the scale is shown. (C) Relative Tfh signature gene expression in sorted CD4<sup>+</sup> Tfh cells from OVA immunized Wt and *Mir155*<sup>-/-</sup> mice based on RNA-Seq. (D) Schematic diagram of the approach used to identify Tfh cell-related miR-155 target genes in aged CD4<sup>+</sup> T cells. (E) QPCR analyses of the indicated miR-155 target genes in CD4<sup>+</sup> T cells from middle-aged Wt and *Mir155*<sup>-/-</sup> mice, or sorted CD4<sup>+</sup>CXCR5<sup>+</sup>PD1<sup>+</sup> Tfh cells from both Ova-immunized Wt and *Mir155*<sup>-/-</sup> mice. Data are presented as fold changes between *Mir155*<sup>-/-</sup> and Wt cells. (F) Relative protein expression in Wt and *Mir155*<sup>-/-</sup> or *Cd4-cre Mir155*<sup>fl/fl</sup> CD4<sup>+</sup> T cells, as indicated. (G) Average percentage of CXCR5<sup>+</sup>PD1<sup>+</sup> Tfh cells among CD3<sup>+</sup>CD4<sup>+</sup>TCRVβ11<sup>+</sup> cells in the spleens following adoptive transfer with the indicated shRNA-containing Wt or *Mir155*<sup>-/-</sup> 2D2<sup>+</sup> T cells and 7 days of immunization with MOG<sub>35-55</sub>. n=3-4 mice per group. (H) Schematic diagram showing the potential pathways regulated by miR-155 and miR-146a during Tfh development. Dashed gray line indicates regulation of the pathway that could be either quantitative (repression or activation) or qualitative (e.g. altered heterodimer complexes). Dashed red inhibition line indicates indirect inhibition.



**Figure S7, related to Figure 7**

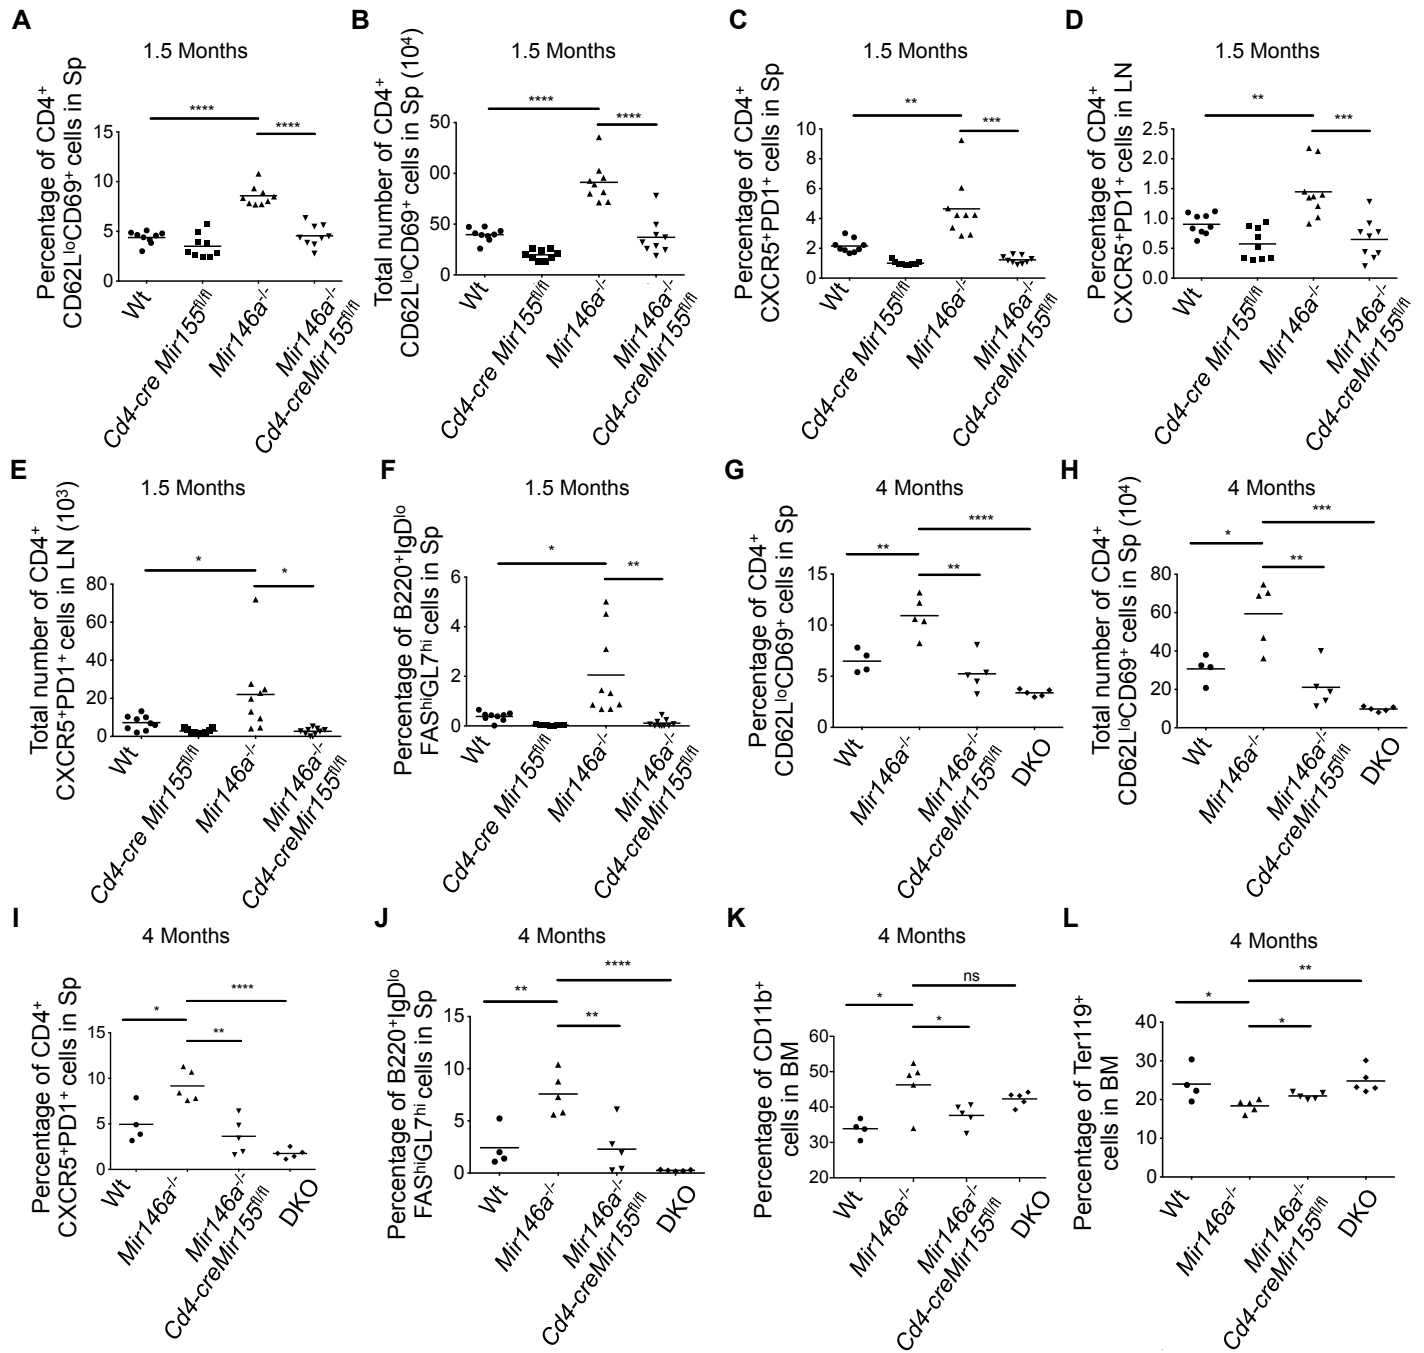

**Figure S7, related to Figure 7. T cell-specific expression of miR-155 is required for activation of CD4<sup>+</sup> T cells and spontaneous accumulation of Tfh cells in *Mir146a*<sup>-/-</sup> mice. (A-F)** Spleens and LNs were harvested from 1.5 months old mice of the indicated genotypes. **(A)** Average percentage of CD62L<sup>lo</sup>CD69<sup>+</sup>CD4<sup>+</sup> T cells in spleens. **(B)** Total number of CD4<sup>+</sup>CD62L<sup>lo</sup>CD69<sup>+</sup> T cells in spleens. **(C)** Average percentage of Tfh cells in spleens. **(D)** Average percentage of Tfh cells in LNs. **(E)** Total number of Tfh cells in LNs. **(F)** Average percentage of GC B cells in spleens. **(G-L)** Spleens and bone marrow were harvested from 4 month old mice of the indicated genotypes. **(G)** Average percentage of CD62L<sup>lo</sup>CD69<sup>+</sup>CD4<sup>+</sup> T cells in spleens. **(H)** Total number of CD4<sup>+</sup>CD62L<sup>lo</sup>CD69<sup>+</sup> T cells in spleens. **(I)** Average percentage of Tfh cells in spleens. **(J)** Average percentage of GC B cells in spleens. **(K)** Average percentage of CD11b<sup>+</sup> cells in the BM. **(L)** Average percentage of Ter119<sup>+</sup> cells in the BM.

**Supplemental Table S1, related to Figure 4. Sequence of the Floxed mouse BIC allele (Homology arms in green, conditional knockout region in red. LoxP sites underlined. Frt sites in italics. Exons are bolded).**

```

1  GCGGCCGCGG  TATGGACTTT  GCCTTGTAAT  TCAGAGCAAT  CGCCTGTGTG  TGTCCCACAC
CGCCGGCGCC  ATACCTGAAA  CGGAACATTA  AGTCTCGTTA  GCGGACACAC  ACAGGGTGTG
61  AAATTAAGTT  CTACAAGACA  AAAGCAAATT  CTCCTATCCT  AGATCCTAAC  ATAATTCCTA
TTAATTCAA  GATGTTCTGT  TTTCGTTTAA  GAGGATAGGA  TCTAGGATTG  TATTAAGAAT
121  CTACATGAAT  TCTTGCATAC  CCAGAGCCAT  TGTCATATAT  GGGGAGAGGA  AAAAATACAA
GATGTACTTA  AGAAGGTATG  GGTCTCGGTA  ACAGTATATA  CCCTTCTCCT  TTTTATGTT
181  AGTGCTGCTT  ATCAGAGTGT  TTGAAACATA  TGGCAATAAC  TAATAGCACA  TACATTTCAA
TCACGACGAA  TAGTCTCACA  AACTTTGTAT  ACCGTTATTG  ATTTATCGTG  ATGTAAGTGT
241  TGGGGGAGTT  TTATTAATAA  TAATTTGTGA  CAAATAATAC  GCGTGATCCT  AAGTAGACAG
GATGCTCAA  AATAATTTTA  ATTAACAAC  GTTTATTATG  CGCCTAGGA  TTCATCTGTC
301  AGGAAGTTCA  TGAGAAGGTG  ACCTTAAAGA  GTGATGATAC  TACAGAATTA  GTAACGTCCA
TCCTTCAAGT  ACTCTTCCAC  TGGAAATTCT  CACTACTATG  ATGTCTTAAT  CATTGACGGT
361  TACATTTCC  TTTCCCAAAA  GATGAAGGGA  AAAAATAGAG  GTTATCAAAA  AAATAAAAAA
ATGTAAGGA  AAAGGGTTT  TTTTATCCT  TTTTATCTC  CAATAGTTTT  TTTATTTTAA
421  TAAAAGAAGA  AAAATCTTAC  TTTTAAAGAA  AAATCTTATT  AAAATCTTAC  TGTGTGGCA
ATTTCTTCT  TTTTAGAATG  AAAAAATCTT  TTTAGAATAA  TTTTAGAATG  ACAACACCGT
481  TTACAGAGTT  TGCCAGACA  TGGCAAGACT  TTGCATAAAT  AGGAAATAAG  AAGGACTAAA
AATGCTCAA  ACGGGTCTGT  ACCGTATTGA  AACGTATTTA  TCCTTTATTC  TTCTGATTT
541  GCAGTGGGCC  TCATCTCATC  AATGCACTCT  CCCCTCCTGT  TCCCTGTTTT  TCCTGTCATG
CGTCACCGG  AGTAGAGTAG  TTACGTGAGA  GGGGAGGACA  AGGACAAAA  AGGACAGTAC
601  TTTTCCCA  TGTCTGTTT  ATAGTGCCTT  AGCAGAGCTT  TGGGCTGCA  CTAAGCCCAT
AAAAGGGGT  ACAGACAAAG  TATCACGGAA  TCGTCTCGAA  ACCGGACGT  GATTCGGGTA
661  GAGGTCCTG  AAGTAAGGAA  GTTGGTTCCT  CCCTGTGATG  CAGTGAAGTG  GGGAGAAAGC
CTCCAGTGAC  TTCATTCTT  CAACCAAGGA  GGGACACTAC  GTCACTTAC  CCCTCTTTCG
721  TGAACTCAGG  CTAGCTCCAC  TCCACGTTAT  CTGCTTGCAC  TCTCCACACC  CAGACTCTGG
ACTTGAGTCC  GATCGAGGTG  AGGTGCAATA  GACGAACGTG  AGAGGTGTGG  GTCTGAGACC
781  AGGAAAGAT  CCTAACCTGT  TTTTCCACA  TCCTTATCTG  ATATTAATCA  TAACCCATGA
TCCCTTTCTA  GGATTGGACA  AAAAAGGTGT  AGGAATAGAC  TATAATTAGT  ATTGGGTACT
841  TGAGCTTAT  GGAAGGCTA  CTTCAGTTCC  ACGGGTCATT  TTAATAAAAT  ATTCTAGCTA
ACCTCGATA  CCCTCCGAT  GAAGTCAAGT  TGCCAGTAA  AATATTTTAA  TAAGATCGAT
901  TAAAATGGG  AAAAAACAGAA  TCATCTTCTA  ATATCTTTTC  TCTTTTGGCA  TTCATAATTA
ATTTTACCC  TTTTGTCTT  AGTAGAAGAT  TATAAGAAAG  AGAAAAACGT  AAGTATTAAT
961  GATGGTCTCT  CAATATATTT  CCATAGTGAT  CCCAATATAG  TATAGTGCCA  TTCTTCTGAG
CTACCAGAGA  GTTATATAAA  GGTATCACTA  GGGTTATATC  ATATCACGGT  AAGAAGACTC
1021  AAGATTCAAA  AGCATGCCGT  ATTTTTTTC  TTGCATGTAT  TAATTTTATT  GGAATTTTTT
TTCTAAGTTT  TCGTACGGCA  TAAAAAACG  AACGTACATA  ATTAATAATA  CCTTTAAAAA
1081  CATAATACAT  AAGAGTATGT  TGTATATAAG  CTGTCTGTG  TCCTTGTGGC  TCCTTTCAAT
GTATTATGTA  TTCTCATACA  ACATATATTC  GACAAGACAC  AGGAACACCG  AGGAAAGTTA
1141  AAGGAACCT  TAATAAAAT  TTTAGGCATT  TTCAATAAAG  AGGTCTCAGC  TAGAAATAAG
TTCCTTGAGA  ATTATTTTAA  AAATCCGTAA  AAGTTATTTT  TCCAGAGTCG  ATCTTTATTC
1201  AGCAGAGAA  GAATTAAGGG  CTTTATGAAA  GAAAATATTA  TGGTGTAAAG  AATTAATAAC
TCGTCTCTTC  CTTAATTTCC  GAAACTTTT  CTTTATAAAT  ACCACATTTT  TTAATTTATG
1261  TCCCCAGAA  ATGGCTTATA  TAAAGATTTT  TCTTAAATGT  AAAAGAAATA  TGAATGTAA
AGGGGTCTT  TACCGAATAT  ATTTCTAAAA  AGAATTTACA  TTTTCTTTAT  ACTTTACATT
1321  TGTACCTGA  TTCAGGATAC  AGATTATTAT  CATAAAGCAA  CTGTTTTGTT  TGTTTTAGAA
ACAGTGGACT  AAGTCCATG  TCTAATAATA  GTATTTCTGT  GACAAAACAA  ACAAATCTT
1381  ATTAATAAT  GTATTTTCTT  CATTAATTTA  TTCATTTTAT  ATCCCAATCA  CAGCCTCCCT
TAATTTTAAA  CATAAAAGAA  GTAATTAAT  AAGTAAATA  TAGGGTTAGT  GTCGGAGGGA
1441  CCTCCCTC  CCCCATTAC  TCCCTCCTCT  TCTCCTCAGA  GAAGGGAAAG  CCCCCATCC
GGGAGGGGAG  GGGGTAATG  AGGGAGGAGA  AGAGGAGTCT  CTTCCCTTTC  GGGGGTAGG
1501  TATGAGTACC  ATCCCACCCT  GGCACATCAA  ATCGCATCAG  AACTAAGTGC  GTCCTTGCC
ATACTCATGG  TAGGGTGGGA  CCGTGTAGTT  TAGCGTAGTC  TTGATTCACG  CAGGAACGGA
1561  GCTGAGAGCA  GACAAGGCAG  CCCGCCTAGG  AGAAGTAGAT  TCCAAGGCAG  AGTCGGAGAC
CGACTCTCGT  CTGTTCCGTC  GGGCGGATCC  TCTTCATCTA  AGGTTCCGTC  TCAGCCTCTG
1621  AAGAAGACTT  ATTGATCCTG  TAGAAGATGT  CAGAAGCAGG  TCACACCAAA  CATCTTTCTC
TTCTTCTGAA  TAACTAGGAC  ATCTTCTACA  GTCTTCGTCC  AGTGTGGTTT  GTAGAAAGAG
1681  AACACGTGA  GCTCGTGTGT  TCAAGACGAA  TTAGCATACT  ACTCATTCTT  TCTCCCTTAT
TTGTGCACCT  CGAGCACACA  AGTTCTGCTT  AATCGTATGA  TGAGTAAGGA  AGAGGGAATA
1741  CCTTAAAGTC  AGATACTGAG  AGGGGAGACA  GAATAGAAAA  GGTCTACAGA  AAACATGCAG
GGAATTTTCA  TCTATGACTC  TCCCTCTGT  CTTATCTTTT  CCAGATGTCT  TTTGTACGTC
1801  TAACCTTCA  GTGGCCCTGC  TTTAGAAAAG  CAGAACTGA  AATCGCCCTC  GAGGCAAAGG
ATTGGAAGTA  CACCGGACG  AAATCTTTTC  GTCTTTGACT  TTAGCGGGAG  CTCGGTTTCC
1861  ATAAGTCTTT  ACACGAAGCA  CTATTGAGAT  ACGTTTTAAT  GATGCTGTAT  AAAACAGAGG
TATTCAGAAA  TGTGCTTCGT  GATAACTCTA  TGCAAAATTA  CTACGACATA  TTTTGTCTCC
1921  TTAAAGTGAC  AGAAAACAAC  CAAAGCTTGG  TTAAACCAC  TCAAACCGCT  CCATCTGTGA

```

AATTTCACTG TCTTTTGTG GTTTCGAACC AATTTTGGTG AGTTTGGCGA GGTAGACACT  
1981 CTATTTTGTG TTGGATGTAA AATGACTGGA GATGCTCAGT CACTTTTGTG CAAGTCTTTC  
GATAAAACAC AACCTACATT TTACTGACCT CTACGAGTCA GTGAAAACAG GTTCAGAAAG  
2041 TTCATCCAAT TAAAAGCTGT CTACCAAGAC CTGGGTCCTT TCTCCTCCGC CTCTGTTCTG  
AAGTAGGTTA ATTTTCGACA GATGGTTCTG GACCAGGAA AGAGGAGGGC GAGACAAGAC  
2101 CACAATGACT AGCTAACTAA CCGATTAAGT GCAAATTAAC TGAGGACTTA AACCCACCC  
GTGTTACTGA TCGATTGATT GGCTAATTCA CGTTTAATTG ACTCCTGAAT TTGGGGTGGG  
2161 CACCCCTCCT TCCTCATTGC ACTGTAGGAA CTTCCACCCT GAAGCCTGTC TCACCCTGGA  
GTGGGGAGGA AGGAGTAACG TGACATCCTT GAAGGTGGGA CTTGGGACAG AGTGGGACCT  
2221 GGAATTGGTT CTGATGGTCA GAGACTCCGG ACTGAGAACA GAAGCCAGGC TAGAGCAGAT  
CCTTAACCAA GACTACCAGT CTCTGAGGCC TGACTCTTGT CTTCCGGTCCG ATCTCGTCTA  
2281 GAAGAACTTT AGGAGCTATA AGAAAGGGCA TGGTGTTCAC AGTCATCTTC AACTTTCATC  
CTTCTTGAAA TCCTCGATAT TCTTTCCCGT ACCACAAGTG TCAGTAGAAG TTGAAAGTAG  
2341 TTAGGTCAA AAGCAACCAA AGCCTTGTTA ACTATGACTC GTGCAGAGCT TCCCCGTGTC  
AATCCAGTTT TCCGTTGGTT TCGGAACAAT TGATACTGAG CACGTCTCGA AGGGCAGAC  
2401 TTCATGTTTT ACTCGGCTGC TTTAACCTTC GCTCCCTACT TCCCTGGTCT AGTCCAGAAC  
AAGTACAAA TGAGCCGACG AAATTGGAAG CGAGGGATGA AGGGACCAGA TCAGGTCTTG  
2461 ATAGCTTTAG AAACGCAGGT TCAGGTTAAA TTCTGGTGGG AAATCCAGAT GATTTGTAAA  
TATCGAAATC TTTGCGTCCA AGTCCCATT AAGACCACC TTTAGGCTA CTAACACTT  
2521 TGCAATGATA TGCAATGAT TTTAGTAATC CACATAGGAT TCAACTATGA ATCTATCTC  
ACGTTACTAT ACGTTAACTA AAATCATTAG GTGTATCCTA AGTTGATACT TAAGATAGAG  
2581 TATTAGTATG TTTTTCAAGT TAATAGATGA TAGAGATAGA TAGATAGATA GATAGATAGA  
ATAATCATAC AAAAAGTTCA ATTATCTACT ATCTCTATCT ATCTATCTAT CTATCTATCT  
2641 TAGATAGATA GATAGATAGA TAGATACATA GATAGATACA TAGATAGATA GATACATAGA  
ATCTATCTAT CTATCTATCT ATCTATGTAT CTATCTATGT ATCTATCTAT CTATGTATCT  
2701 TACATAGATA CATAGATACA TAGATACATA GATACATAGA TAGATACATA GATACATAGA  
ATGTATCTAT GTATCTATGT ATCTATGTAT CTATGTATCT ATCTATGTAT CTATGTATCT  
2761 TAGATACATA GATACAGATA TAGATAGATA TAGATAGATA GATAGATAGA TAGATAGATA  
ATCTATGTAT CTATGTCTAT CTATCTATCT ATCTATCTAT CTATCTATCT ATCTATCTAT  
2821 GACAGACACA TAGACACATA GATACATAGA TTGTAGATG ATAAATTAGA TAAACTCATC  
CTGTCTGTGT ATCTGTGTAT CTATGTATCT AACAACTAC TATTTAATCT ATTTGAGTAG  
2881 TGCAATTAAC CTTTTAATT TGCCAAAATA TGACCTTCTT TTCACCTAGT GGCTTTAAAA  
ACTTAATTTG GTAATAATTA CAGGTTTTAT ACTGGAAGAA AAGTGGATCA CCGAAATTTT  
2941 CTAGAATTTG TGTTACTCTA TCAATACACA ATCATGCTTT TCCAAAGAAG TGATATTTCA  
GATCTTAAAC ACAATGAGAT AGTTATGTGT TAGTACGAAA AGGTTTCTTC ACCTATAAGT  
3001 TTCACTTCAG AACCTCAAAG GAACAGTTTC CAAAATTTG TATATGTCAA AGTGAATAGC  
AAGTGAAGTC TTGGAGTTTC CTTGTCAAAG GTTTTTAAAC ATATACAGTT TCACTTATCG  
3061 TAGGGCTGTC CCACATGGTA TTGGTGAAAA ATACAACCAC TGGCTTCCCTA TAAAGAAAAT  
ATCCCGACAG GGTGTACCAT AACCACTTTT TATGTTGGTG ACCGAAGGAT ATTTCTTTTA  
3121 ATPTCATCAT GCAGTTTCTT TGATAACTCT CGAATGGTTG GTGCTAAGAA TAAGCCAGAC  
TAAAGTAGTA CGTCAAAGAA ACTATTGAGA GCTTACCAAC CACGATTCTT ATTCGGTCTG  
3181 AAAAAAATAA GCACATAGAT ATATACACAT GTATATACAT ATATATATAA TTGTAGGAGG  
TTTTTTTATT CGTGTATCTA TATATGTGTA CATATATGTA TATATATATT AACATCCTCC  
3241 TTCTAATTTCA TGATTTTCTT GCTTGTGTTG TGTACGTAT GTTTGTTTGA AATACAGTCT  
TAGATTAAGT ACTAAAAGAA CGAACAAACG AACATGCATA CAAACAACT TTATGTCAGA  
3301 CTCCCTATAT AAACCAGAGT AGCCTGGAAC TCCCAGAAAC CTTACTGCCT CTGCTTTTTG  
GAGGGATATA TTTGGTCTCA TCGGACCTTG AGGGTCTTTG GAATGACGGA GACGAAAAAC  
3361 AGTGTAAAGA TTAAGGTGT GTGCCACCAC ACTTGGCCTA CAACCTATGA TTTTAAACATA  
TCACGATTCT AATTCCCACA CACGGTGGTG TGAACCGGAT GTTGAGTACT AAAATTGTAT  
3421 AAGTGAGACC CTCATAAAAC AAATGGAGTC ATTTGAGAGA AAAGGTGGGA ATGAATGCAG  
TTCACCTCTG GAGTATTTTG TTTACCTCAG TAAACTCTCT TTTCCACCCT TACTTACGTC  
3481 ATGTCTTTGA TAACTCAATC AGAAACTTAA AACTGGTTAC AGTGGCAAAG TTTGTTTGTG  
TACAGAAACT ATTGAGTTAG TCTTTGAATT TTGACCAATG TCACCCTTTC AAACAAACAT  
3541 TGTATGTATA TGTGTGTGTA TGTATGTATG TATGTATGTA TGTATGTATG TATGTATGTA  
ACATACATAT ACACACACAT ACATACATAC ATACATACAT ACATACATAC ATACATACAT  
3601 TGTATATGTG TGTATGTATG TATGTATGTA TGTATGTATG TATGTAGATA TATGTGTGTA  
ACATATACAC ACATACATAC ATACATACAT ACATACATAC ATACATCTAT ATACACACAT  
3661 TATGTATATG ATGAAAGTTG AAGATGAGTA TGAATATGAT GCCCTTCTT ACAGCTCCAA  
ATACATATAC TACTTTCAAC TTCTACTCAT ACTTATACTA CGGGAAAGAA TGTCGAGGTT  
3721 AAGTTCATCT ACCCTACTCT GTATGTGTGT GTCTGTGTGT GTGTGTTATA TGTGTGAGAT  
TTCAAGTAGA TGGGATGAGA CACACACACA CAGACACACA CACACAATAT ACACACTCTA  
3781 ACATGTGTGT GTGTGTGTTA CCACAAAAA ATTACTAAAA ATAAAAAGAT CCAGTATAGG  
TGACACACA CACACACAAT GGTGTTTTTT TAATGATTTT TATTTTTCTA GGTATATCC  
3841 ACATATCTCT CTCTGAGTAC CTTAGCTGAT AACATTTTCC CTGGCAAATC AGCAAGACTA  
TGTATAAGAA GAGACTCATG GAATCGACTA TTGTAAGAGG GACCGTTTAT TCGTCTGAT  
3901 GACAGATTGT GACATTCTAT GCCTCCCTTA TACCTCAAAA TATTTATCCTG AAGAAAAGTC  
CTGTCTAACA CTGTAAGATA CGGAGGGAAT ATGGAGTTTT ATAATAGGAC TTCTTTTCAG  
3961 TAATTATATT CTCTGGAAT GTCCTTAGGT TTAGGCTATA CCACAGAGAA ATGGTGATAT  
ATTAATATAA GAGGACCTTA CAGGAATCCA AATCCGATAT GGTGTCTCTT TACCACATA  
4021 GCCACATAGT GAATGGGACC TGGACTTACG ATTTGTCTGA ACTAAATATA GTGCTTAAAG  
CGGTGTATCA CTTACCCTGG ACCTGAATGC TAAACAGACT TGATTTATAT CAGGAATTCC

4081 TTGGTCGAGA TTTTACCTA AGGTCAAAG AGTTGATTGC AATAGCAATT CCTAACATTA  
AACCAGCTCT AAAAATGGAT TCCAGTTTTC TCAACTAACG TTATCGTTAA GGATTGTAAT  
4141 TATTTTATTA TTTATTGAGA CGGGGTCCAA TATAGCCCAA GCTGACCCCA GAGGTGATAA  
ATAAAATAAT AAATAACTCT GCCCCAGGTT ATATCGGGTT CGACTGGGGT CTCCACTATT  
4201 GTAATTGGGA ACAGCCCTGA GCTCATGATC CTCCTAAGTC CATCTCTCAA GTCCTGAGAT  
CATTAACCCCT TGTCGGGACT CGAGTACTAG GAGGATTGAG GTAGAGAGTT CAGGACTCTA  
4261 CAAAGGCTGC ACCAGTGTCC ATGTATGTGG TACTTGGGAA TCAAACCTAG GCTTTTCATG  
GTTTCCGACG TGGTCACAGG TACATACACC ATGAACCCCT AGTTTGGATC CGAAAAGTAC  
4321 TAGATAGATG ATAGATAGAT AGATAGATAG ATAGATAGAT AGATAGATAG ATAGATAGAT  
ATCTATCTAC TATCTATCTA TCTATCTATC TATCTATCTA TCTATCTATC TATCTATCTA  
4381 AGATAGGFTG GTATGTGTGC ACACATGTAT GTATATATGT AATATACATA TATATGTATA  
TCTATCCACA CATACACACG TGTGTACATA CATATATACA TTATATGTAT ATATACATAT  
4441 TATGGCTATA CATATATATG TATATATGGC TATATATATA TAGCCAGATG TGGTGGTATA  
ATACCGATAT GTATATATAC ATATATACCG ATATATATAT ATCCGGTCTAC ACCACCATAT  
4501 TGGCTATAAT TCCAGAATTT GGGAGACTGA AGTGTAAAGT CATGAGTTCA AGGCCAGCCT  
ACCGATATTA AGGTCTTAAA CCCTCTGACT TCACATTCCA GTACTCAAGT TCCGGTCCGA  
4561 AGTTTATATA GGGCAACCTT GGCTACCTAT ACTAAATATA TTCTTGGTAA TACCTTTATT  
TCCAATATAT CCCGTTGGAA CCGATGGATA TGATTATAT AAGAACCATT ATGGAAATAA  
4621 CAGATGGTAT CTTTAAAGGA TAGAAACAGA ACTTATAGAT AAGTTATTTA CTTAAATTGG  
GTCATACCATA GAAATTTCCCT ATCTTTGTCT TGAATATCTA TTCAATAAAT GAATTTAAC  
4681 AATGGGGTTA TGTAGGCACT CATGCACACA TGCACAGTTG CATATATTCT CCCTAATGGG  
TTACCCCAAT ACATCCGTGA GTACGTGTGT ACGTGTCAAC GTATATAAGA GGGATTACCG  
4741 TCAATAATAT GGCATGAAGT AGAACACTAG AATCTTAATA GATTTACTGA GGACTTACTG  
AGTTTATATA CCGTACTTCA TCTTGTGATC TTAGAATTAT CTAATGACT CCTGAATTGAC  
4801 AGTTCAATGC ACTATGAAGA GAAAAGGTAT TATTACAGTC TTTCTTTTGG CTGAAATAA  
TCAAGTTACG TGATACTTCT CTTTTCCATA ATAATGTGAG AAAGAAAACC GACTTTTATT  
4861 ATCCAAGATT GAAACTGTGT AATTCACAGA CTTTCCTCAT GAAACCAGCT CATCTGAGAA  
TAGGTTCTAA CTTTGACACA TTAAGTGTCT GAAAGGAGTA CTTTGGTCCG GTAGACTCTT  
4921 AACAGCAAAG TTTAAAAAAG AAATACTATC AGTAAGTATG ATATATTTCC TTGGTTTGGG  
TTGTCGTTTC AAATTTTTTC TTTATGATAG TCATTCATAC TATATAAAGG AACCAAACCT  
4981 AATTTCCAAG CCACGATATT CTGCCCTGTC AAAATATATT CACTGGGGAA TTTTAACTT  
TTAAAGGTTT GGTGCTATAA GACGGGACAG TTTTATATAA GTGACCCCTT AAAAATTGAA  
5041 GATGCATTTT TTTTGAACCT AATCACATTT CTACATCTAG CTGGTTTCAT TATTAAGAA  
CTACGTAAGG AAAACTTGAA TTAGTGTAAA GATGTAGATC GACCAAAGTA ATAATTTCTT  
5101 AAGAAAAGGT GGTTCGCCCT TGGTCCATAA GGAACCACA GACTTGAGTG ATGCTTGAAC  
TTCTTTTCCA CCAAGGGGAG ACCAGGATTT CCCTTGGTGT CTGAACTCAC TAGCAACTTG  
5161 TTCTAGGTTT CCGTACAGTA ACACTGAAAC CAGAAACTTG TGGGAGAAAT GTCACCTTAT  
AAGATCCAAG CGCATGTCTAT TGTGACTTTG GTCTTGAAC ACCCTCTTTA CAGTGAATA  
5221 CTGAGAGAGT AAAATCCAAC TCTAACAGGA AACAGCAAAT TCATCTTTTT TCTTTTTCTA  
GACTCTCTCA TTTTGTGTTG AGATTGTCTT TTTGCTTTTA AGTAGAAAAA AGAAAAAGAT  
5281 AACCACTCTG CTGGAGACAA GTCCCTTGAG TCAGAGCTCT TTAAGGCGCA CTTCTTTTAC  
TTGGTGAGAC GACCTCTGTT CAGGGAACCT AGTCTCGAGA AATCCCGCT GAAGGAAATG  
5341 ATGGGTCAA A CTGAAGCCAC CGGTTTGTGA GTCCCAAAG GAATCACTGG AGGACAACAG  
TACCAGTTT GACTTCGGTG GCCAAACACT CAGGGGTTTC CTTAGTGACC TCCTGTTGTC  
5401 GAGCATTTTC AGATACCTTT CAGGATCCGG TACCAAAGGC CGCAATGGCC AAACCTGCAG  
CTCGTAAAAG TCTATGAAA GTCCTAGGCC ATGGTTCCG GCGTTACCG TTTGGACGTC  
5461 GAAGTACCAG AGCTCCCTAG GTTCTAGAAC CGGTACGTT AAGCTCGAAT AACTTCGTAT  
CTCATGGTCT TCGAGGATC CAAAGTCTTG GCCACTGCAA TTCGAGCTTA TTGAAGCATA  
5521 AATGTATGCT ATACGAAGTT ATCCTGCAGG TCGATCGAGA CCGTACGGCA GACCTGCCCT  
TTACATACGA TATGCTTCAA TAGGACGTCC AGCTAGCTCT GGCATGCCGT CTGGACGGGA  
5581 GGCTGTACCC CCTATCTTGA AGAAAAAGAA AAACGAATAA GGTGAAAATC GCAACTACTA  
CCGACATGGG GGATAGAACT TCTTTTCTT TTTGCTTATT CCCTTTTAG CGTTGATGAT  
5641 TTTATAGAA CAAAATGGGT TCATCCATTG AGTTTAACT TTCAAAAATC ATAAAGTACC  
AAATATCTTA GTTTTACCCA AGTAGGTAAC TCAAAATTGA AAGTTTTTAG TATTTATGG  
5701 ATCCTAAATA TCTGAGATTT CTGAAATGTC CTAGTGACCT GTGGGATGTA CGTCAGAATA  
TAGGATTTAT AGACTCTAAA GAACCTAACG GATCACTGGA CACCTACAT GCAGCTTAT  
5761 TTACCCAGAA CTGAAGTGT TCCTTTGAA CTTCAGCATT GTAGAACTAT GAACCGTGGC  
AATGGGTCTT GACTTCAACA CAGGAACTT GAAGTCGTAA CATCTGATA CTGGCAGCG  
5821 TGTGTTAAAA ATGATACATG TATTCAAATA TTTCCACAGA ATTTAAAGTT TGATTTTATA  
ACACAATTTT TACTATGTAC ATAAGTTTAT AAAGTGTCT TAAATTTCAA ACTAAAATAT  
5881 ATTAGTTTTT AAATTGCAAA CTTTACAAAA ATTTTCCAAA ATTTACTTAG AAGCATTTCA  
TAATCAAAAA TTTAACGTTT GGAATGTTTT TAAAAGGTTT TAAATGAATC TTGTAAGT  
5941 GAGCTCTTTT CTTTCAAAGC TGAAGTCTAC CTTGCTTCA GATTCATAAT CGTTCACCT  
CTCGAGAAAA GAAAGTTTCG ACTTCAGATG GAACGGAAGT CTAAGTATTA GCAAGTGAGA  
6001 ACTTTATAAC TAACTGTGTG CGTACACACA ACTATTTCTT TTTCTCTTTG CAGGTGCTGC  
TGAAATATG ATTGACACAC GCATGTGTGT TGATAAAGAA AAAGAGAAAC GTCCACGAGC  
6061 AACACAGGAA GGGGAAGTGT GTGGTTTAAG TTGCATATCC CTTATCTCTT GGCTGCTGGA  
TTTGGTCTT CCCCTTCACA CACCAATTC AACGTATAGG GAATAGGAGA CCGACGACT  
6121 GGTCTGCTGA AGGCTGTATG CTGTTAATGC TAATTGTGAT AGGGGTTTTG GCCTCTGACT  
CCGACGACT TCCGACATAC GACAATTACG ATTAACACTA TCCCCAAAAC CGGAGACTGA  
6181 GACTCTTACC TGTAGCATT AACAGGACAC AAGGCTGTT ACTAGCACTC ACATGGAACA

CTGAGGATGG ACAATCGTAA TTGTCCTGTG TTCCGGACAA TGATCGTGAG TGTACCTTGT  
 6241 AATGGCCACC GTGGGAGGAT GACAAGTCCA AGAGTCACCC TGCTGGATGA ACGTAGATGT  
 TTACCGGTGG CACCCTCCTA CTGTTCAGGT TCTCAGTGGG ACGACCTACT TGCATCTACA  
 6301 CAGACTCTAT CATTTAATGT GCTAGTCATA ACCTGGTTAC TAGGATAGTC CACTGTAAGT  
 GTCTGAGATA GTAAATFACA CGATCAGTAT TGGACCAATG ATCCTATCAG GTGACATFCA  
 6361 GTTACGATAA ATGTCATTTA AAAGATAGAT CAGCAGTATC CTAACAACA TCTCAACTTC  
 CAATGCTATT TACAGTAAAT TTTCTATCTA GTCGTCATAG GATTGTTTGT AGAGTTGAAG  
 6421 AAGCCCACAT GTTTATTTTT TATCTTGAAT GGAAAGTGAA ACTTGTATCA TTTTATTTTC  
 TTCGGGTGTA CAAATAAAAA ATAGAACTTA CCTTTCACCT TGAACATAGT AAAAATAAAG  
 6481 AAAATTATGT TCATAACCAT CTTCAATGAT TCAACCAGAA TACAAAATGA ATGCACTAAA  
 AAAATAATACA AGTATTGGTA GAAGTTACTA AGTTGGTCTT ATGTTTACT TACGTGATTT  
 6541 AAGGACATTT CTATATTTCT GTAGTTAAAA TTCAGGACGG CCATTCTCGA CTGACATCTA  
 TTCCTGTAAA GATATAAAGA CATCAATTTT AAGTCTGCC GGTAAGAGCT GACTGTAGAT  
 6601 GGATTGTCTG GAATACCTCT TGTAAGACTT GGAAATGGCA TTTTTCAC ATTACAATGT  
 CCTAACAGAC CTTATGGAGA ACATTCTGAA CCTTAACCGT AAAAAGGTG TAATGTTACA  
 6661 TTTAGTCAAC TTTGATTAA AATTTGTAAC TCTTGTGTTT TAGTGAAGG AAAAATTTAG  
 TAATCAGTTG AAATAAATT TTAACATTG AGAACACAAA ATCACATTCC TTTTAAATC  
 6721 GGTAGTGTG AGAGTTTAGG GCTAGGTAAG GAAAACTGA GTCACACTG AATGATTTTT  
 CCAATCACAA TCTCAAATCC CGATCCATTC CTTTTGACT CAGTTGTGAC TTAATAAAA  
 6781 TTTAAATCTA TGAGCCAGCT GTTGGTAGTT TACTCCTTTA ATCCCAGCAC TCGGGAGCA  
 AATTTTAGAT ACTCGGTCGA CAACCATCAA ATGAGGAAAT TAGGGTCGTG AGCCCTCCGT  
 6841 GAGACAGCCA GATGGCTGAG TCGAAGGCCA ACCTGGTCTA CAGAGTGAGC TCCAGGACAG  
 CTCTGTCCGT CTACCGACTC AGCTTCCGGT TGGACCAGAT GTCTCACTCG AGGTCTGTG  
 6901 CCTTAGCTAC ACAGAAAAAT GCCTTATCAA AAAATTAAGA AAATAAGATG AAGTATTTAA  
 GGAATCGATG TGTCTTTTAA CGGAATAGTT TTTTAATTCT TTTATTCTAC TTCATAATTT  
 6961 AAGTGACATG ACAAAATCATT CCTGAGGGCT ACCTATATAT TCCTCACACG GTATAAATAT  
 TTCACTGTAC TGTTTAGTAA GGACTCCCGA TGGATATATA AGGAGTGTGC CATATTTATA  
 7021 TTAATTTAAT TAATATTTAA TTAATAATAT TCACATTTGA AATGAAACCC AAATCTGGGT  
 AATTAATTA ATTATAAATT AAAGTTTATA AGTGTAACCT TTACTTTGGG TTTAGACCCA  
 7081 TCAGCTTAC TGCTTTAGCT GCACAGTAAA GCTGTGTAGT AAGGAGACCC ACGTTTCTCA  
 AGTTCGAATG ACGAAATCGA CGTGTCAATT CGACACATCA TTCCTCTGGG TGCAAAGGAT  
 7141 CCAATTTCTT CATGAATGCG GATGAAACTT TACAAGGTTG GTGTGCAGCT CACTGGAGAT  
 GCGTAAAGAA GTACTTACGC CTACTTTGAA ATGTTCCAAC CACACGTCGA GTGACCTCTA  
 7201 GAACAACCTT TTGTAAGGTA ATAAAATCCC ACAGTGATGT CTTAAAGCCA ATCCAAAAC  
 CTGTTGAGA AACATTCCAT TATTTTAGGG TGTCACTACA GAATTTCCGT TAGGTTTTGA  
 7261 CACCCCGTTG CCTGACATAG GTAATAATTT GATATACAGA AGTTAATGT TGAATTCCT  
 GTGGGGCAAC GGACTGTATC CATTATTTAA CTATATGTCT TCAAATTACA AACTTAAGGA  
 7321 ATGCAATTTT TCTCCACAGT GATATCACTG ACGAACACAT AGACAGCTGG ACTGTATATA  
 TACGTTAAAA AGAGGTGTCA CTATAGTGAC TGCTTGTGTA TCTGTGACC TGAACAATAT  
 7381 TTTAATTTAT ACCTGTCTTT TTTTTTTTTT TTTAAAGACT TTTTATTTAT GTATATATAT  
 AAATTAATA TGGACAAGAA AAAAAAAAAA AAATTTCTGA AAAATAAATA CATATATATA  
 7441 GTATATATAT ATTTATGTAT ATATGTAAGT ACACGTAGC TGTCTTCAGA CACACCAGAA  
 CATATATATA TAAATACATA TATACATTCA TGTGACATCG ACAGAAGTCT GTGTGGTCTT  
 7501 GAGGGAGTCA GATCTTGTTA CGGATGGTTG TGAGCCACCA TGTGGTTGCT GGGATTTGAA  
 CTCCCTCAGT CTAGAACAAT GCCTACCAAC ACTCGGTGGT ACACCAACGA CCCTAACTT  
 7561 CTCTGGACCT TCGGAAGAGC AGTCGGGTGC TCTTACCCAC TGAGCCATCT CACCAGCCCT  
 GAGACCTGGA AGCCTTCTCG TCAGCCCACG AGAATGGGTG ACTCGGTAGA GTGGTCGGGA  
 7621 AATTTATACC TGTTCTGATA GTTCTCCTGA ATATCTGTG CAGGACGAAG TTCCTATACT  
 TTAATATGGA ACAAGACTAT CAAGAGGACT TATAGAACAG CAGCTGCTTC AAGGATATGA  
 7681 TTCTAGAGAA TAGGAACCTC GGATCCACGA TTCGAGGGCC CCTGCAGGTC AATCTACCG  
 AAGATCTCTT ATCCTTGAAG CCTAGGTGCT AAGTCCCGG GGACGTCCAG TTAAGATGGC  
 7741 GGTAGGGGAG GCGCTTTTCC CAAGGCAGTC TGGAGCATGC GCTTTAGCAG CCCCCTGGG  
 CCATCCCTC CGCGAAAAGG GTTCCGTCAG ACCTCGTACG CGAAATCGTC GGGGCGACCC  
 7801 CACTTGGCGC TACACAAGTG GCCTCTGGCC TCGCACACAT TCCACATCCA CCGGTAGGCG  
 GTGAACCGCT ATGTGTTTAC CGGAGACCGG AGCGTGTGTA AGGTGTAGGT GGCCATCCCG  
 7861 CCAACCGGCT CCGTCTTTG GTGGCCCTT CGCGCCACCT TCTACTCCTC CCTAGTCAG  
 GGTGCGCGA GGCAAGAAAC CACCGGGGAA GCGCGGTGGA AGATGAGGAG GGATCAGTC  
 7921 GAAGTTCGCC CCGGCCCGC AGCTCGGTC GTGCAGGACG TGACAAATGG AAGTAGCACG  
 CTCAAGGGG GGGCGGGGCG TCGAGCGCAG CACGTCCTGC ACTGTTTACC TTCATCGTGC  
 7981 TCTCACTAGT CTCGTGCAGA TGGACAGCAC CGCTGAGCAA TGGAGCGGG TAGGCCTTG  
 AGAGTGATCA GAGCACCTCT ACCTGTCTGT GCGACTCGTT ACCTTCGCCC ATCCGAAAC  
 8041 GGCAGCGGC CAATAGCAGC TTTGCTCCTT CGCTTCTG GCTCAGAGGC TGGGAGGGG  
 CCGTTCGCGG GTTATCGTCG AAACGAGGAA GCGAAAGACC CGAGTCTCCG ACCCTTCCC  
 8101 TGGTCCGGG GCGGGGCTCA GGGCGGGCT CAGGGCGGG GCGGGCGCCC GAAGTCCCTC  
 ACCCAGGCC CCGCCGAGT CCGCCCGCA GTCCCGCCC CGCCCGCGGG CTTCAGGAG  
 8161 CGGAGGCCCG GCATTCTGCA CGCTTCAAAA GCGCACGTCT GCCCGCTGT TCTCCTCTC  
 GCCTCCGGGC CGTAAGACGT GCGAAGTTTT CGCGTGCAGA CCGCGCGACA AGAGGAGAG  
 8221 CTCATCTCCG GGCCTTTGCA CCTGCAGCCA ATATGGGATC GGCATTGAA CAAGATGGAT  
 GAGTAGAGGC CCGGAAAGCT GGACGTCGGT TATACCTTAG CCGGTAACCT GTTCTACCTA  
 8281 TGCACGCGAG TTCTCCGGCC GCTTGGGTGG AGAGGCTATT CCGCTATGAC TGGGCACAAC  
 ACGTGCCTCC AAGAGGCCGG CGAACCCACC TCTCCGATAA GCCGATACTG ACCCGTGTG

|       |                   |                   |                   |                    |                   |                    |
|-------|-------------------|-------------------|-------------------|--------------------|-------------------|--------------------|
| 8341  | AGACAATCGG        | CTGCTCTGAT        | GCCGCCGTGT        | TCCGGCTGTC         | AGCGCAGGGG        | CGCCCGGTTC         |
|       | TCTGTTAGCC        | GACGAGACTA        | CGGCCGCACA        | AGGCCGACAG         | TCGCGTCCCC        | GCGGGCCAAG         |
| 8401  | TTTTTGTCAA        | GACCGACTTG        | TCCGGTGCCT        | TGAATGAAC          | GCAGGACGAG        | GCAGCGCGGC         |
|       | AAAAACAGTT        | CTGGCTGGAC        | AGGCCACGGG        | ACTTACTTGA         | CGTCTGCTC         | CGTCGCGCCG         |
| 8461  | TATCGTGGCT        | GGCCACGACG        | GGCGTTCCTT        | GCGCAGCTGT         | GCTCGACGTT        | GTCAGTGAAG         |
|       | ATAGCACCGA        | CCGGTGTGTC        | CCGCAAGGAA        | CGCGTCGACA         | CGAGCTGCAA        | CAGTGACTTC         |
| 8521  | CGGGAAGGGA        | CTGGCTGCTA        | TTGGGCGAAG        | TGCCGGGGCA         | GGATCTCCTG        | TCATCTCACC         |
|       | GCCCTTCCCT        | GACCGACGAT        | AACCCGCTTC        | ACGGCCCCGT         | CCTAGAGGAC        | AGTAGAGTGG         |
| 8581  | TTGCTCCTGC        | CGAGAAAGTA        | TCCATCATGG        | CTGATGCAAT         | GCGCGGGCTG        | CATACGCTTG         |
|       | AACGAGGACG        | GCTCTTTCAT        | AGGTAGTACC        | GACTACGTTA         | CGCCGCCGAC        | GTATGCGAAC         |
| 8641  | ATCCGGCTAC        | CTGCCCATTC        | GACCACCAAG        | CGAAACATCG         | CATCGAGCGA        | GCAGTACTC          |
|       | TAGGCCGATG        | GACGGGTAAG        | CTGGTGGTTC        | GCTTTGTAGC         | GTAGCTCGCT        | CGTGCATGAG         |
| 8701  | GGATGGAAGC        | CGGTCTTGTC        | GATCAGGATG        | ATCTGGACGA         | AGAGCATCAG        | GGGCTCGGCG         |
|       | CCTACCTTCG        | GCCAGAACAG        | CTAGTCTTAC        | TAGACCTGCT         | TCTCGTAGTC        | CCCGAGCGCG         |
| 8761  | CAGCCGAAC         | GTTCCGCAGG        | CTCAAGGCGC        | GCATGCCCGA         | CGGCGAGGAT        | CTCGTCGTGA         |
|       | GTCGGCTTGA        | CAAGCGGTCC        | GAGTTCGCGG        | CGTACGGGCT         | GCCGCTCCTA        | GAGCAGCACT         |
| 8821  | CCCATGGCGA        | TGCCTGCTTG        | CCGAAATATCA       | TGGTGGAAAA         | TGGCCGCTTT        | TCTGGATTCA         |
|       | GGTACCCTCT        | ACGGACGAAC        | GGCTTATAGT        | ACCACCTTTT         | ACCGGCGAAA        | AGACCTAAGT         |
| 8881  | TCGACTGTGG        | CCGGCTGGGT        | GTGGCGGACC        | GCTATCAGGA         | CATAGCGTTG        | GCTACCCGTG         |
|       | AGCTGACACC        | GGCCGACCCA        | CACCGCCTGG        | CGATAGTCTT         | GTATCGCAAC        | CGATGGGCAC         |
| 8941  | ATATTGCTGA        | AGAGCTTGGC        | GGCGAATGGG        | CTGACCGCTT         | CCTCGTGCTT        | TACGGTATCG         |
|       | TATAACGACT        | TCTCGAACCG        | CCGCTTACCC        | GACTGGCGAA         | GGAGCACGAA        | ATGCCATAGC         |
| 9001  | CCGCTCCCGA        | TTCGCAGCGC        | ATCGCCTTCT        | ATCGCCTTCT         | TGACGAGTTC        | TTCTGAGGGG         |
|       | GCGCGGGGCT        | AAGCGTCGCG        | TAGCGGAAGA        | TAGCGGAAGA         | ACTGCTCAAG        | AAGACTCCCC         |
| 9061  | ATCGATCCGC        | TGTAAGTCTG        | CAGAAATTGA        | TGATCTATTA         | AACAATAAAG        | ATGTCCACTA         |
|       | TAGCTAGGCG        | ACATTCAGAC        | GTCTTTAACT        | ACTAGATAAT         | TTGTTATTTC        | TACAGGTGAT         |
| 9121  | AAATGGAAGT        | TTTTCTGTGC        | ATACTTTGTT        | AAGAAGGGTG         | AGAACAGAGT        | ACCTACATTT         |
|       | TTTACCTTCA        | AAAAGGACAG        | TATGAAACAA        | TTCTTCCCAC         | TCTTGTCTCA        | TGGATGATAA         |
| 9181  | TGAATGGAAG        | GATTGGAGCT        | ACGGGGGTGG        | GGGTGGGGTG         | GGATTAGATA        | AATGCCTGCT         |
|       | ACTTACCTTC        | CTAACCTCGA        | TGCCCCACC         | CCCACCCAC          | CCTAATCTAT        | TTACGGACGA         |
| 9241  | CTTTACTGAA        | GGCTCTTTAC        | TATTGCTTTA        | TGATAATGTT         | TCATAGTTGG        | ATATCATAAT         |
|       | GAAATGACTT        | CCGAGAAATG        | TATAAGAAAT        | ACTATTACAA         | AGTATCAACC        | TATAGTATTA         |
| 9301  | TTAAACAAGC        | AAAACCAAA         | TAAGGGCCAG        | CTCATTCCTC         | CCACTCATGA        | TCTATAGATC         |
|       | AAATTTGTTCG       | TTTTGGTTTA        | ATTCCCGGTC        | GAGTAAGGAG         | GGTGAAGTACT       | AGATATCTAG         |
| 9361  | TATAGATCTC        | TCGTGGGATC        | ATTGTTTTTC        | TCTTGATTCC         | CACCTTGTGG        | TTCTAAGTAC         |
|       | ATATCTAGAG        | AGCACCCCTAG       | TAACAAAAAG        | AGAACCTAAGG        | GTGAAACACC        | AAGATCTATG         |
| 9421  | TGTGGTTTTCC       | AAATGTGTCA        | GTTTCATAGC        | CTGAAGAACG         | AGATCAGCAG        | CCTCTGTTCC         |
|       | ACACCAAAGG        | TTTACACAGT        | CAAAGTATCG        | GACTTCTTGC         | TCTAGTCTGC        | GGAGACAAGG         |
| 9481  | ACATACACTT        | CATTCTCAGT        | ATTGTTTTGC        | CAAGTTCTAA         | TCCCATCAGA        | AGCTGACTCT         |
|       | TGTATGTGAA        | GTAAGAGTCA        | TAACAAAAACG       | GTTCAAGATT         | AAGGTAGTCT        | TCGACTGAGA         |
| 9541  | AGATCCTGCA        | GGAATTCGAA        | <i>GTTCTATAC</i>  | <i>TTTCTAGAGA</i>  | <i>ATAGGAACTT</i> | CCTCGACGAT         |
|       | TC TAGGAGCT       | <i>CCTTAAGCTT</i> | <i>CAAGGATATG</i> | <i>AAAGATCTCT</i>  | <i>TATCCTTGAA</i> | GGAGCTGTCA         |
| 9601  | CCGGAACCTT        | TAATATAACT        | TCGTATAATG        | TATGCTATAC         | GAAGTTATTA        | GGTCCCTCGA         |
|       | GGCCTTGGGA        | ATTATATTGA        | AGCATATTAC        | ATACGATATG         | CTTCAATAAT        | CCAGGGGACT         |
| 9661  | AGAGGTTTAC        | TAGTACTGGC        | CAATCGGCGC        | <i>GCCATTGTCT</i>  | <i>TCCCTATAGC</i> | <i>CAAATAAATG</i>  |
|       | TCFCCAAGTG        | ATCATGACCG        | GTTAGCCGCG        | <i>CGGTAACAGA</i>  | <i>AGGGATATCG</i> | <i>GTTTATTTTAC</i> |
| 9721  | <i>TCTTTGAGTC</i> | <i>TTTAGTTGGC</i> | <i>TTAGAATACT</i> | <i>TTTTGTGTTGT</i> | <i>GATGACCCCT</i> | <i>TCTTTTGCAA</i>  |
|       | <i>AGAAACTCAG</i> | <i>AAATCAACCG</i> | <i>AATCTTATGA</i> | <i>AAAACAAACA</i>  | <i>CTACTGGGAA</i> | <i>AGAAAACTGT</i>  |
| 9781  | AGTACAGACT        | GTGATTTTCA        | AAGACACACA        | AAAAAGACAA         | CAATGGAATA        | AGTCACAAGG         |
|       | TCATGTCTGA        | CACTAAAGTC        | TTCTGTGTGT        | TTTTTCTGTT         | GTTACCTTAT        | TCAGTGTTC          |
| 9841  | ACAGTGAGAG        | GAATGCCCTT        | GCCTGCCATG        | ACACAGACAG         | GGCACGCCAC        | CCCCACTGCC         |
|       | TGTCACTCTC        | CTTACGGGGA        | CGGACGGTAC        | TGTGTCTGTC         | CCGTGCGGTG        | GGGTGACGG          |
| 9901  | CCACTGCCTT        | CTGCCGAGTA        | CGCTGCCGAC        | ATAAATTCTT         | CCTCTCAACC        | CTGGATGGA          |
|       | GGTGACGGAA        | GACGGCTCAT        | GCGACGGCTG        | TATTTAAGGA         | GGAGAGTTGG        | GAACCTACCT         |
| 9961  | GCTTCAGGAG        | TCCTTGTTAC        | GAGTCTCAAT        | TCTTCAAAAT         | CCTTTTGTCT        | GCCTACAACC         |
|       | CGAAGTCCCT        | AGGAACATGG        | CTCAGAGTTA        | AGAAGTTTTA         | GGAAAAACGA        | CGGATGTTGG         |
| 10021 | ACAAAGTCAC        | AGAAAGCTAG        | GAACCCGCTG        | CGTTCTCTAC         | ATTACCCTCC        | AGCAGTTCCA         |
|       | TGTTTCAGTG        | TCTTTCGATC        | CTTGGGGGAC        | GCAAGAGATG         | TAATGGGGAG        | TCGTCAAGGT         |
| 10081 | ATCAAAAGCT        | CTGAAATCAT        | AAAGCACTGT        | AACACCTACT         | GCATGCTTAG        | GCAAATCACT         |
|       | TAGTTTTCGA        | GACTTTAGTA        | TTTCGTGACA        | TTGTGGATGA         | CGTACGAATC        | CGTTTAGTGA         |
| 10141 | TGCTCCATGT        | CTGTTTCTCC        | ATCAGTGTGT        | GTATCTCTGT         | GATGTAATTT        | TATTAAGGCT         |
|       | ACGAGGTACA        | GACAAAGAGG        | TAGTCACACA        | CATAGAGACA         | CTACATTAAG        | ATAATTCCGA         |
| 10201 | TAGATGAAAT        | ACCACAAGAG        | GGAACACACT        | TTCTACCAGC         | ATTTAAGTGA        | TGAATACATA         |
|       | ATCTACTTTA        | TGGTGTCTC         | CCTTGTGTGA        | AAGATGGTCG         | TAAATTCACT        | ACTTATGTAT         |
| 10261 | CAAACCTTGA        | AACATGTATA        | AGTCCATAAT        | CTAAATCGAC         | GCAGCAGGCG        | TCCCTGGAAC         |
|       | GTTTGGAACT        | TTGTACATAT        | TCAGGTATTA        | GATTTAGCTG         | CGTCTCCGCG        | AGGGACCTTG         |
| 10321 | ACCACCACTC        | CTCAGCTATC        | ATCCCACTT         | AACCACTT           | ACAACCCAGA        | CGTGGCCAGC         |
|       | TGCGGTGGAG        | GAGTCGATAG        | TAGGGTGGGA        | TTGGTGGGTG         | TGTTGGGTCT        | GCACCGGTCC         |
| 10381 | AGGCTGGGTC        | TTCCCGGATG        | CCCAACTCTA        | CTAGCTGACC         | TCTTGGCATC        | ACAGATGGAT         |
|       | TCCGACCCAG        | AAGGGCTTAC        | GGGTTGAGAT        | GATCGACTGG         | AGAACCGTAG        | TGCTTACCTA         |
| 10441 | TATTCTTGAC        | CAACATTTCC        | AGTCATTTCA        | AAAATTCTTG         | GAGTATGAGT        | TAAGGCTGGG         |

ATAAGGACTG GTTGTAAGG TCAGTAAGGT TTTTAAGAAC CTCATACTCA ATTCCGACCC  
10501 TGTGTTTGGG GTGGAGAGTA AGTAATGAGG AAGTTTGTGT GTGTGTGTGT GTGTGTGTGT  
ACACAAAACCT CACCTCTCAT TCATTACTCC TTCAAAACACA CACACACACA CACACACACA  
10561 GTGTGTGTGT GTGTGTGTGT GTGAGTAAAG GAAGGGCAGC CCAATTTCTG GCACAGAAGA  
CACACACACA CACACACACA CACTCATTTT CTTCOCGTG GGTAAAGCA CGTGTCTTCT  
10621 CTAAGGGGAA TGAAGCACTG AATTACATAG GATGACCTGG GCACAGACCA GCCCCTGAAG  
GATTTCCCTT ACTTCGTGAC TTAATGTATC CTACTGGACC CGTGTCTGGT CGGGACTTC  
10681 CCATTGGCTG AGAGTTAGAA AACAAGTTTT TCCTGGTCTT CATGTGGGAC TTCTAACAGT  
GGTAACCGAC TCTCAATCTT TTGTTCAAAA AGGACCAGAA GTACACCCTG AAGATTGTCA  
10741 GAGAGCAGGG GCTGCCTCTG ACTGTGCCTT GCCTGTGGGA CCCTTTCAGG CTGCCTAATG  
CTCTCGTCCC CGACGGAGAC TGACAACGGA CGGACACCCT GGGAAAGTCC GACGGATTAC  
10801 GGCTGCCTTG TCTAGCCTCA ACGAGAGAAG ATGTGCCTAG CCTTAACTGC AACTTTTTAT  
CCGACGGAAC AGATCGGAGT TGCTCTCTTC TACACGGATC GGAATTGACG TTGAAAAATA  
10861 GCTAGGGCTG GTTGATATCC ATGGGAGGCC TCCCCTTTTC TGAAGAGAAA CAGAGTGGAT  
CGATCCCGAC CAACTATAGG TACCCTCCGG AGGGGAAAAG ACTTCTCTTT GTCTCACCTA  
10921 GAGGTGGGAG AAAGGACTGG GAGGAGAGGA AGTTCTAGTC GGGATGTATA AGTAATTAGA  
CTCCACCCTC TTTCTGACC CTCTCTCCT TCAAGATCAG CCCTACATAT TCATTAATCT  
10981 AAAAGATTTT TGTAAAGAA ACTAACTAGG AAATAATTAG AAAAGGAAAC CCAGCTTTTC  
TTTTCTAAAA AACATTTCTT TGATTGATCC TTTATTAATC TTTTCTTTG GGTGAAAAG  
11041 TTCTCGCTC TCATCAGCTA AATAAACCTA GTAGCAGAGG TAGGACAGGA GAGAAAGCTG  
AACGAGCGAG AGTAGTCGAT TTATTTGGAT CATCGTCTCC ATCCTGTCTT CTCTTCGAC  
11101 GGACAGACTG AGGCACACAT AGAAACTGTG GCATAACAGT CATTTCTCTG GAATAAATGG  
CCTGTCTGAC TCCGTGTGTA TCTTTGACAC CGTATTGTCA GTAAAGGACT CTTATTTACC  
11161 TCAGGGCATG AAAGAATGGG GAAACTTGAA GTAAAATACA AGTGGGAAA ACACCGCAAC  
AGTCCCGTAC TTTCTTACCC CTTTGAACCT CATTTTATGT TCACCCTTTT TGTGCGCTTG  
11221 GAAGGAAATT AAATAAATAC AGCTCAAAAT TCCTAAGTGA GCAGACCCAC TAAGGACCAA  
CTTCTTTAA TTTATTTATG TCGAGTTTTA AGGATTCAC CTCTGGGGTG ATTCCTGGTT  
11281 GAGACCGGCA CAGCTACAGA ATGTACAGAA CCCGTAACAA CAAAAGCAAG TCCCCACAG  
CTCTGGCCGT GTCGATGTCT TACAGTCTTA GGGCATTGTT GTTTTCGTTT CAGGGTGTTC  
11341 TGCCAGGAC AGAGCTTCAG GTTAAATCA GACAAGAACC AGGCTGTCTG TCTGTCTCAG  
ACAGGTCGTG TCTCGAAGTC CAATTTTAGT CTGTTCTTGG TCCGACAGTC AGAACAGTCG  
11401 ATGTCTCACTT GCCAGAAGCC AACTGGGCTC TTTCTGAGTC CTGATAGGAA ACTGTTTCA  
TAACAGTGAA CGGTCTTCGG TTGACCCGAG AAAGACTCAG GACTATCCTT TGACAAAAGT  
11461 AAATAGAATT CCGTATCTAG TCAAACAGCT GCTCAAAGCC AGCACAGCTA AAAGCCGGTG  
TTTATCTTAA GGCATAGATC AGTTTGTGCA CGAGTTTCGG TCGTGTGAT TTTCCGGCAC  
11521 TTAGGACCCA GTTCACTTTG CCTTACGGAT TTTCCCTTAG GAAGGCAGTG GGAACAGCT  
ATCCGTGGGT CAAGTGGAA GGAATGCCTA AAAGGGGATC CTCCGTCAC CCCTGTCTGA  
11581 CTAGGGAATG AGAGCCGGGC CTAGTGAATT TCGGTATATG ATATTTTTAT TTACAACATT  
GATCCCTTAC TCTCGGCCCG GATCACTTAA AGCCATATAC TATAAAAATA AATGTTGTAA  
11641 TTTATAATAA TGTTTTATTAC ATATGTGTAT ATATATACAC ACACACACAT ATATATATAC  
AAGTATTATT ACAAATAATG TATACACATA TATATATGTG TGTGTGTGTA TATATATATG  
11701 ATATATATAT ACATACATAT ATATATACAC ACACACACAC ACACACATAT ATATATATAT  
TATATATATA TGTATGTATA TATATATGTG TGTGTGTGTG TGTGTGTATA TATATATATA  
11761 ATATATAATC TAAAAAGAGA AAAGTATGTT TGGAGGCTAG CATCTGGTAG CATCTAACAG  
TATATATTAG ATTTTTCTCT TTTGATCAAA ACCTCCGATC GTAGACCATC GTAGATTGTC  
11821 AACTCCGCTA CCAGAATGCA AACTTATCCA GGTATCCCTG CGGGCGGCAG CACCTGTGAG  
TTGAGGCGAT GGTCTTACGT TTGAATAGGT CCATAGGGAC GCCCGCGTC GTGGACACTC  
11881 AGTAGGACAG CCTTGGTAAG ATCACCTGCA CTCTCTATGG TGATGAAAACA GAAACACTGT  
TCATCTCGTC GGAACCATTC TAGTGGACGT GAGAGATACC ACTACTTTGT CTTTGTGACA  
11941 CTTAACAAGT GGAATTAATA TAAGATGCTC ACACCTAAT TCTAGGACTT GGAAGGCAGA  
GAATTGTTC CCCTTAATTT ATTCTACGAG TGTGGGATTA AGATCCTGAA CCTCCGTCT  
12001 GGCAGGAGGG CTGCATAGCC AGTCCAGAC CAGGTTTAA CACACACTGA GACGCTGGCT  
CCGTCTCCC GACGTATCGG TCAAGGCTG GTCCAAATTG ATGTGTGACT CTGCGACCGA  
12061 CAAATAAAAC AACAGAGAAG CTCCGGGGAG GGAGGGCCT AGGGGTGCTT AACACACTGG  
GTTATTTTTG TTGTCTCTT GAGGCCCTC CCTCCCGGA TCCCCACGAA TTGTGTGACC  
12121 CACATAGTAG CGACACAGTT AACAGCATCG CCCATCTGCA AACACATTAT TTCGAACATG  
GTGTATCATC GGTGTGTCAT TTGTCTGAGC GGGTAGACGT TTGTGTAATA AAGCTTGTAC  
12181 GATGTTTACT AGAGCACTCT TTAACAGACC CAAACTGGCG CACACACAGT GTATTTTCCC  
CTACAAATGA TCTCGTGAGA AATTTGTGCG GTTTGACCGC GTGTGTGTCA CATAAAGGG  
12241 ATGTGTCTAT CCATGGGGAG GAGGCGCATG GACCTCCTTA AAGTCTGTAT CTGCAGACGA  
TACACAGATA GGTACCCCTC CTCCGCTAC CTGGAGGAAT TTCAGACATA GACGCTCTCGT  
12301 GGGACAAAAC CACATTGTAT TAAAAGCTTT TATTTTAATT TACTCTACAA GTTTAAATTT  
CCCTGTTTGT GTGTAACATA ATTTTCGAAA ATAAAATTA ATGAGATGTT CAAATTTAAA  
12361 TAGAACACTA CTGGGTGGAT TCGGTGTTCT CTGTCTGTCT GACTTCATCT TCAGTTACCT  
ATCTTGTGAT GACCCACCTA AGCCACAAGA GACAGACAGA CTGAAAGTAGA AGTCAATGGA  
12421 GTGAAGACAG CAACAGTTTT ACTCCTCCGG CTCTTTCAGC CCACCCTGTG CACAGTTCAA  
CACTTCTGTC GTTGTCAAAA TGAGGAGGCC GAGAAAAGTC GGTGGGACAC GTGTCAAGTT  
12481 CCCCCACTCC CCCTCTGTG AAGACCTGTC CCACTTCCTT CAGGAATTAT CACAGATTT  
GGGGGTGAGG GGGAGGACAC TTCTGGACAG GGTGAAGGAA GTCCCTAATA GTGTCTCAAA  
12541 AACACAACA AAACAAGTTC CGATATAAAC CACCAAGTGT GGCATTAATA AACTATATAA  
TTGTTGTTGT TTTGTTCAAG GCTATATTTG GTGGTTCACA CCGTAATTTT TTGATATATT



12601 CAGAAGGCAT ATTAACGTAG GCTTCCTAAG TTTCTCACCT TATTCTTATC TATAAAACAA  
GTCTTCCGTA TAATTGCATC CGAAGGATTG AAAGAGTGGG ATAAGAATAG ATATTTTGTG  
12661 AAGCATTACT ATGAGAAAAAT TAGCAGGAGG GAAACACAGG GTATTCTTCA TCAATGTGTC  
TTGTAATGA TACTCTTTTA ATCGTCTCC CTTTGTGTCC CATAAGAAGT AGTTACACAG  
12721 TTAGTGGGT CGCGACGCGT GCTAGCCCGG GCGCCTAGTT ATTAATAGTA ATCAATTACG  
AATGACGCCA GCGCTGCGCA CGATCGGGCC CGCGGATCAA TAATTATCAT TAGTTAATGC  
12781 GGGTCATTAG TTCATAGCCC ATATATGGAG TTCCGCGTTA CATAACTTAC GGTAAATGGC  
CCCAGTAATC AAGTATCGGG TATATACCTC AAGGCGCAAT GTATTGAATG CCATTTACCG  
12841 CCGCTGGGT GACCGCCCAA CGACCCCGC CCATTGACGT CAATAATGAC GTATGTTCCC  
GGCGGACCGA CTGGCGGGTT GCTGGGGGCG GGTAACTGCA GTTATTACTG CATACAAGG  
12901 ATAGTAACGC CAATAGGAC TTTCCATTGA CGTCAATGGG TGGAGTATT ACGGTAACT  
TATCATTGCG GTTATCCCTG AAAGGTAAC GCAGTTACCC ACCTCATAAA TGCCATTTGA  
12961 GCCCACTGG CAGTACATCA AGTGTATCAT ATGCCAAGTA CGCCCTAT TGACGTCAAT  
CGGGTGAACC GTCATGTAGT TCACATAGTA TACGGTTCAT GCGGGGATA ACTGCAGTTA  
13021 GACGGTAAAT GGCCCGCTG GCATTATGCC CAGTACATGA CCTTATGGGA CTTTCTACT  
CTGCCATTTA CCGGGCGGAC CGTAATACGG GTCATGTACT GGAATACCCT GAAAGGATGA  
13081 TGGCAGTACA TCTACGTATT AGTCATCGCT ATTACCATGG TCGAGGTGAG CCCACGTC  
ACCGTCAATG AGATGCATAA TCAGTAGCGA TAATGGTACC AGCTCCACTC GGGGTGCAAG  
13141 TGCTTCACTC TCCCCTCTC CCCCCTCC CCACCCCAA TTTTGTATT ATTTATTTT  
ACGAAGTGAG AGGGGTAGAG GGGGGGAGG GGTGGGGTT AAAACATAAA TAAATAAAAA  
13201 TAATTATTTT GTGCAGCGAT GGGGGCGGG GGGGGGGGG GCGCGCGCC AGCGGGGCG  
ATTAATAAAA CACGTGCGTA CCCCCGCCC CCCCCCCCC CCGCGCGCGG TCCGCCCGC  
13261 GGGCGGGGCG AGGGCGGGG CGGGCGGAG CGGAGAGGTG CCGCGGCAGC CAATCAGAGC  
CCCGCCCCG TCCCCTCCG GCCCCCTCC GCCTCTCCAC GCGCCCGTCG GTTAGTCTCG  
13321 GCGCGCTCC GAAAGTTTCC TTTTATGGC AGGCGCGGC GCGCGCGCC CTATAAAAAG  
CCGCGGAGG CTTTCAAAG AAAATACCG TCCGCGCGG CCGCGCGCG GATATTTTTC  
13381 CGAAGCGCG GCGGGCGGC TCGACCTGC AGGTCTCCG CATGGACCCT GATGATGTTG  
GCTTCGCGCG CCGCCCCCG ACCTGGACG TCCAGGAGCG GTACCTGGGA CTACTACAAC  
13441 TTGATCTTC TAAATCTTT GTGATGGAAA ACTTTTCTTC GTACCACGG ACTAACCTG  
AACTAAGAAG ATTTAGAAAA CACTACCTTT TGAAAAGAAG CATGGTGCC TGATTTGAC  
13501 GTTATGTAGA TTCCATTCAA AAAGGTATAC AAAAGCCAAA ATCTGGTACA CAAGGAAAT  
CAATACATCT AAGGTAAAGT TTTCCATATG TTTTCGGTT TAGACCATGT GTTCTTTAA  
13561 ATGACGATGA TTGAAAGGG TTTTATAGTA CCGACAATA ATACGACGCT GCGGGATACT  
TACTGCTACT AACCTTCCC AAAATATCAT GGCTGTTATT TATGCTGCGA CGCCCTATGA  
13621 CTGTAGATAA TGAAAACCCG CTCTCTGGAA AAGCTGGAG CGTGGTCAA GTGACGTATC  
GAGACTTATT ACTTTTGGG GAGACCTTT TTCGACCTCC GCACCAGTT CACTGCATAG  
13681 CAGGACTGAC GAAGGTCTC GCACTAAAAG TGGATAATGC CGAAACTATT AAGAAAGAGT  
GTCTGACTG CTTCCAAGAG CGTGATTTTC ACCTATTACG GCTTTGATAA TTCTTCTCA  
13741 TAGGTTTAA TCTCACTGAA CCGTTGATGG AGCAAGTCGG AACGGAAGAG TTTATCAAAA  
ATCCAATTC AAGGTGACTT GGCAACTACC TCGTTCAGCC TTGCTTCTC AAATAGTTT  
13801 GGTTGCGTGA TGGTGTCTC CGTGTAGTGC TCAGCCTTCC CTTGCTGAG GGGAGTTCTA  
CCAAGCCACT ACCACGAAG GCACATCACG AGTCGGAAGG GAAGCGACTC CCCTCAAGAT  
13861 CCGTTGAATA TATTAATAAC TGGGAACAGG CGAAAGCGTT AAGCGTAGAA CTTGAGATTA  
GGCAACTTAT ATAATTATTG CCTTGTGCC GCTTTCGCAA TTCGCATCTT GAACCTAAT  
13921 ATTTTGAAC CCGTGGAAAA CGTGGCCAAG ATGCGATGTA TGAGTATATG GCTCAAGCCT  
TAAAACCTTG GGCACCTTT GCACCGGTT TACGTACAT ACTCATATAC CGAGTTCGGA  
13981 GTGACGAAA TCGTGTGAG CGATCTCTT GTGAAGGAAA CCTTACTTCT GTGGTGTGAC  
CAGCTCCCTT AGCACAGTCC GCTAGAGAAA CACTTCTTT GGAATGAAGA CACCACCTG  
14041 ATAATTGGAC AAACACTCA CAGAGATTTA AAGCTCTAAG GTAATAATAA AATTTTTAAG  
TATTAACCTG TTTGATGGAT GTCTCTAAAT TTCGAGATTC CATTTATATT TTAATAATTC  
14101 TGTATAATGT GTTAAACTAC TGATTCTCAA TTGTTTGTGT ATTTTAGATT CCAACCTATG  
ACATATTACA CAATTTGATG ACTAAGGATT AACAAACACA TAAAATCTAA GGTGGATAC  
14161 GAACTGATGA ATGGGAGCAG TGGTGGAAAT CAGATCCACT AGGATCTAAC TTGTTTATTG  
CTTGACTACT TACCCTCGTC ACCACCTTAC GTCTAGGTGA TCCTAGATTG AACAAATAAC  
14221 CAGCTTATAA TGGTTACAAA TAAAGCAATA GCATCACAAA TTTACAAAAT AAAGCATTTT  
TCGAATATT ACCAATGTTT ATTTCTGTTAT CGTAGTGTTT AAAGTGTTTA TTTCTGAAA  
14281 TTTCACTGCA TTCTAGTTGT GGTTTGTCCA AACTCATCAA TGATCTTAT CATGTCTGGA  
AAAGTGACGT AAGATCAACA CCAAACAGGT TTGAGTAGTT ACATAGAATA GTACAGACCT  
14341 TCGTAGTTCT AGAGCGGACC GAGGGGGCCC GACTACGCC TTAAGTGAGT CGTATTACGG  
AGCATCAAGA TCTCGCCTGG CTCCCCTGG CATGATGCGG AATTCCTCA GCATAATGCC  
14401 ACTGGCCGTC GTTTTACAAC GTCGTGACTG GGAAAACCTT GCGCTTACCC AACTTAATCG  
TGACCGGAG CAAAATGTTG CAGCACTGAC CCTTTTGGGA CCGCAATGGG TTGAATTAGC  
14461 CCTTGCAGCA CATCCCCCT TCGCCAGCTG GCGTAAATAGC GAAGAGGCC GCACCGATCG  
GGAACCTCGT GTAGGGGAA AGCGGTGAC CGCATATCG CCGTATTCG CTTCTCGGG CGTGGCTAGC  
14521 CCTTCCCAA CAGTTGCGCA GCCTGAATGG CGAATGGCG TTCGCTTGGT AATAAAGCCC  
GGGAAGGGTT GTCAACGCGT CGGACTTACC GCTTACCGCG AAGCGACCA TTATTTCCGG  
14581 GCTTCGGCGG GCTTTTTTTT GTTAACTACG TCAGGTGGCA CTTTTCGGGG AAATGTGCGC  
CGAAGCCCG CGAAAAAAA CAATTGATGC AGTCCACCGT GAAAAGCCCC TTTACACGCG  
14641 GGAACCCCTA TTTGTTTATT TTTCTAAATA CATTCAAATA TGATCCGCT CATGAGACAA  
CCTTGGGGAT AAACAAATAA AAAGATTTAT GTAAGTTTAT ACATAGGCGA GTACTCTGTT  
14701 TAACCCTGAT AAATGCTTCA ATAATATTGA AAAAGGAAGA GTATGAGTAT TCAACATTT

|       |             |             |             |             |             |             |
|-------|-------------|-------------|-------------|-------------|-------------|-------------|
|       | ATTTGGGACTA | TTTACGAAGT  | TATTATAACT  | TTTTCTTCT   | CATACTCATA  | AGTTGTAAG   |
| 14761 | CGTGTGCGCC  | TTATTCCTT   | TTTTGCGGCA  | TTTTGCCTTC  | CTGTTTTTGC  | TCACCCAGAA  |
|       | GCACAGCGGG  | AATAAGGGAA  | AAAACGCCGT  | AAAACGGAAG  | GACAAAAACG  | AGTGGGTCTT  |
| 14821 | ACGCTGGTGA  | AAGTAAAAGA  | TGCTGAAGAT  | CAGTTGGGTG  | CACGAGTGGG  | TTACATCGAA  |
|       | TGGGACCACT  | TTCATTTTCT  | ACGACTTCTA  | GTCAACCCAC  | GTGCTCACCC  | AATGTAGCTT  |
| 14881 | CTGGATCTCA  | ACAGCGGTAA  | GATCCTTGAG  | AGTTTTCGCC  | CCGAAGAACG  | TTCTCCAATG  |
|       | GACCTAGAGT  | TGTCGCCATT  | CTAGGAACTC  | TCAAAAGCGG  | GGCTTCTTGC  | AAGAGGTTAC  |
| 14941 | ATGAGCACTT  | TTAAAGTTCT  | GCTATGTGGC  | GCGGTATTAT  | CCCGTGTGTA  | CGCCGGGCAA  |
|       | TACTCGTGAA  | AATTTCAAGA  | CGATACACCG  | CGCCATAATA  | GGGCACAAC   | GCGGCCCGTT  |
| 15001 | GAGCAACTCG  | GTCGCCGCAT  | ACACTATTCT  | CAGAATGACT  | TGGTTGAGTA  | CTCACCAGTC  |
|       | CTCGTTAGCG  | CAGCGCGTA   | TGTGATAAGA  | GTCTTACTGA  | ACCAACTCAT  | GAGTGGTCAG  |
| 15061 | ACAGAAAAGC  | ATCTTACGGA  | TGGCATGACA  | GTAAGAGAAT  | TATGCAGTGC  | TGCCATAACC  |
|       | TGCTTTTTCG  | TAGAATGCCT  | ACCGTACTGT  | CATTCTCTTA  | ATACGTCACG  | ACGGTATTGG  |
| 15121 | ATGAGTGATA  | ACACTGCGGC  | CAACTTACTT  | CTGACAACGA  | TCCGAGGACC  | GAAGGAGCTA  |
|       | TACTACTAT   | TGTGACGCCG  | GTTGAATGAA  | GACTGTTGCT  | AGCCTCCTGG  | CTTCTCGAT   |
| 15181 | ACCGCTTTTT  | TGCACAACAT  | GGGGGATCAT  | GTAACCTGCC  | TTGATCGTTG  | GGAAACCGGAG |
|       | TGGCGAAAAA  | ACGTGTTGTA  | CCCCTAGTA   | CATTGAGCGG  | AAC TAGCAAC | CCTGGCCCTC  |
| 15241 | CTGAATGAAG  | CCATACCAAA  | CGACGAGCGT  | GACACCACGA  | TGCTGTAGC   | AATGGCAACA  |
|       | GACTTACTTC  | GGTATGGTTT  | GCTGCTCGCA  | CTGTGGTGT   | ACGGACATCG  | TTACCGTTGT  |
| 15301 | ACGTTGCGCA  | AACATTAAC   | TGGCGAACTA  | CTTACTCTAG  | CTTCCCGGCA  | ACAATTAATA  |
|       | TGCAACGCGT  | TTGATAATTG  | ACCGCTTGAT  | GAATGAGATC  | GAAGGGCCGT  | TGTTAATTAT  |
| 15361 | GACTGGATGG  | AGGCGGATAA  | AGTTGACGGA  | CCACTTCTGC  | GCTCGGCCCT  | TCCGGCTGGC  |
|       | CTGACCTACC  | TCCGCCTATT  | TCAACGTCCT  | GGTGAAGACG  | CGAGCCGGGA  | AGGCCGACCG  |
| 15421 | TGTTTTATTG  | CTGATAAATC  | TGGAGCCGGT  | GAGCGTGGGT  | CTCGCGGTAT  | CATGCGACGA  |
|       | ACCAAATAAC  | GACTATTTAG  | ACCTCGGCCA  | CTCGCACCCA  | GAGCGCCATA  | GTAACTGCTG  |
| 15481 | CTGGGGCCAG  | ATGGTAAGCC  | CTCCCGTATC  | GTAGTTATCT  | ACACGACGGG  | GAGTCAGGCA  |
|       | GACCCCGGTC  | TACCATTCCG  | GAGGGCATAG  | CATCAATAGA  | TGTGCTGCC   | CTCAGTCCGT  |
| 15541 | ACTATGGATG  | AACGAAATAG  | CAGGATCGCT  | GAGATAGGTG  | CCTCACTGAT  | TAAGCATTTG  |
|       | TGATACCTAC  | TTGCTTTATC  | TGTCTAGCGA  | CTCTATCCAC  | GGAGTGACTA  | ATTTCGTAACC |
| 15601 | TAAGTGTGAG  | ACCAAGTTTA  | CTCATATATA  | CTTTAGATTG  | ATTTACCCCG  | GTGATAATC   |
|       | ATTGACAGTC  | TGGTTCAAAT  | GAGTATATAT  | GAAATCTAAC  | TAAATGGGGC  | CAACTATTAG  |
| 15661 | AGAAAAGCCC  | CAAAAACAGG  | AAGATTGTAT  | AAGCAAATAT  | TTAAATTGTA  | AACGTTAATA  |
|       | TCTTTTCGGG  | GTTTTTGTCC  | TTCTAACATA  | TTCTTTTATA  | AATTTAACAT  | TTGCAATTAT  |
| 15721 | TTTTGTAAAA  | ATTCGCGTTA  | AATTTTGTGT  | AAATCAGCTC  | ATTTTTTAAC  | CAATAGGCCG  |
|       | AAAACAATTT  | TAAGCGCAAT  | TTAAAAACAA  | TTTAGTTCGAG | TAAAAAATG   | GTTATCCGGC  |
| 15781 | AAATCGGCAA  | AATCCCTTAT  | AAATCAAAAG  | AATAGCCCGA  | GATAGGGTTG  | AGTGTGTGTC  |
|       | TTTAGCCGTT  | TTAGGGAATA  | TTTAGTTTTTC | TTATCGGGCT  | CTATCCCAAC  | TCACAACAAG  |
| 15841 | CAGTTTGAAA  | CAAGAGTCCA  | CTATTAAGA   | ACGTGGACTC  | CAACGTCAA   | GGCGGAAAAA  |
|       | CTCAAACCTT  | GTTCTCAGGT  | GATAATTTCT  | TGCACCTGAG  | GTTGCAGTTT  | CCCGCTTTTT  |
| 15901 | CGCTCTATCA  | GGCGGATGGC  | CCACTACGTG  | AACCATCAC   | CAAAATCAAGT | TTTTTGGGGT  |
|       | GGCAGATAGT  | CCCGCTACCG  | GGTGTATGCAC | TTGGTAGTGG  | GTTTAGTTCA  | AAAAACCCCA  |
| 15961 | CGAGGTGCGC  | TAAAGCACTA  | AATCGGAACC  | CTAAAGGGAG  | CCCCCGATTT  | AGAGCTTGAC  |
|       | GCTCCACGGC  | ATTTCTGTAT  | TTAGCCTTGG  | GATTTCCCTC  | GGGGGCTAAA  | TCTCGAACTG  |
| 16021 | GGGAAAAGCG  | AACGTGGCGA  | GAAAGGAAGG  | GAAGAAAAGC  | AAAGGAGCGG  | GCCTGAGTGG  |
|       | CCCCTTTTCG  | TTGCACCGCT  | CTTTCTTTC   | CTTCTTTTCG  | TTTCTTCGCC  | CGCGATCCCG  |
| 16081 | GCTGGCAAAGT | GTAGCGGTCA  | CGCTGCGCGT  | AACCACCACA  | CCCGCCGCGC  | TTAATGCGCC  |
|       | CGACCGTTCA  | CATCGCCAGT  | CGCAGCGCGA  | TTGGTGGTGT  | GGGCGGCGCG  | AATTACGCGG  |
| 16141 | CGTACAGGGC  | GCGTAAAAGG  | ATCTAGGTGA  | AGATCCTTTT  | TGATAATCTC  | ATGACCAAAA  |
|       | CGATGTCCCG  | CGCATTTTTC  | TAGATCCACT  | TCTAGGAAAA  | ACTATTAGAG  | TACTGGTTTT  |
| 16201 | TCCTTAACG   | TGAGTTTTTCG | TTCCACTGAG  | CGTCAGACCC  | CGTAGAAAAG  | ATCAAAGGAT  |
|       | AGGGAATTGC  | ACTCAAAAGC  | AAGGTGACTC  | GCAGTCTGGG  | GCATCTTTTC  | TAGTTTCTTA  |
| 16261 | CTTCTTGAGA  | TCCTTTTTTT  | CTGCGGTAA   | TCTGTGCTTT  | GCAAAACAAA  | AAACCACCGC  |
|       | GAAGAACTCT  | AGGAAAAAAA  | GACGCGCATT  | AGACGACGAA  | CGTTTGTTTT  | TTTGGTGGCG  |
| 16321 | TACCAGCGGT  | GGTTTGTTTG  | CCGGATCAAG  | AGCTACCAAC  | TCTTTTTCGG  | AAGGTAACGT  |
|       | ATGGTCGCCA  | CCAAACAAAC  | GGCCTAGTTC  | TCGATGGTTG  | AGAAAAAGGC  | TTCCATTGAC  |
| 16381 | GCTTCAGCAG  | AGCGCAGATA  | CCAAACTACTG | TTCTTCTAGT  | GTAGCCGTAG  | TTAGGCCACC  |
|       | CGAAGTCGTC  | TCGCGTCTAT  | GGTTTTATGAC | AAGAAGATCA  | CATCGGCATC  | AAATCCGGTGG |
| 16441 | ACTTCAAGAA  | CTCTGTAGCA  | CCGCCTACAT  | ACCTCGCTCT  | GCTAATCCTG  | TTACCAGTGG  |
|       | TGAAGTTCTT  | GAGACATCGT  | GGCGGATGTA  | TGGAGCGAGA  | CGATTAGGAC  | AATGGTCACC  |
| 16501 | CTGCTGCCAG  | TGGCGATAAG  | TCGTGTCTTA  | CCGGGTGGA   | CTCAAGCGA   | TAGTTACCGG  |
|       | GACGACGGTC  | ACCGCTATTC  | ACGACAGAAT  | GGCCCAACCT  | GAGTTCTGCT  | ATCAATGGCC  |
| 16561 | ATAAGGCGCA  | GCGGTGCGGC  | TGAACGGGGG  | GTTCTGTGAC  | ACAGCCACG   | TTGGAGCGAA  |
|       | TATTCCGCGT  | CGCCAGCCCG  | ACTTGCCCCC  | CAAGCACGTG  | TGTCGGGTG   | AACCTCGCTT  |
| 16621 | CGACCTACAC  | CGAACTGAGA  | TACCTACAGC  | GTGAGCTATG  | AGAAAGCGCC  | ACGCTTCCCG  |
|       | GCTGGATGTG  | GCTTACTCT   | ATGGATGTCG  | CACCTCGATAC | TCTTTCGCGG  | TGCGAAGGGC  |
| 16681 | AAGGGAGAAA  | GGCGGACAGG  | TATCCGGTAA  | GCGGCAGGGT  | CGGAACAGGA  | GAGCGCACGA  |
|       | TTCCCTCTTT  | CCGCCTGTCC  | ATAGGCCATT  | CGCCGTCCCA  | GCCTTGTCTT  | CTCGCGTCT   |
| 16741 | GGGAGCTTCC  | AGGGGAAAC   | GCCGTGATC   | TTTATAGTCC  | TGTCGGGTTT  | CGCCACCTCT  |
|       | CCCTCGAAGG  | TCCCCCTTTG  | CGGACCATAG  | AAATATCAGG  | ACAGCCCAA   | CCGGTGGAGA  |
| 16801 | GACTTGAGCG  | TCGATTTTTG  | TGATGCTCGT  | CAGGGGGCG   | GAGCCTATGG  | AAAAACGCCA  |
|       | CTGAACTCGC  | AGCTAAAAAC  | ACTACGAGCA  | GTCCCCCGC   | CTCGGATACC  | TTTTTGGCGT  |

16861 GCAACGCGGC CTTTTACGG TTCCTGGCCT TTTGCTGGCC TTTTGCTCAC ATGTAATGTG  
CGTTGCGCCG GAAAAATGCC AAGGACCGGA AAACGACCGG AAAACGAGTG TACATTACAC  
16921 AGTTAGCTCA CTCATTAGGC ACCCCAGGCT TTACACTTTA TGCTTCCGGC TCGTATGTTG  
TCAATCGAGT GAGTAATCCG TGGGGTCCGA AATGTGAAAT ACGAAGGCCG AGCATACAAC  
16981 TGTGGAATTG TGAGCGGATA ACAATTCAC ACAGGAAACA GCTATGACCA TGATTACGCC  
ACACCTTAAC ACTCGCCTAT TGTTAAAGTG TGTCCTTTGT CGATACTGGT ACTAATGCGG  
17041 AAGCTACGTA ATACGACTCA CTAG  
TTCGATGCAT TATGCTGAGT GATC

**Supplemental Table S2, related to Figure 6. miR-155 targets in Tfh cells.**

| GeneID             | GeneName | Fold (KO Tfh/Wt Tfh) |
|--------------------|----------|----------------------|
| ENSMUSG00000022687 | Boc      | 4.132471013          |
| ENSMUSG00000020303 | Stc2     | 3.56824407           |
| ENSMUSG00000020607 | Fam84a   | 2.901785139          |
| ENSMUSG00000024673 | Ms4a1    | 2.84088474           |
| ENSMUSG00000000266 | Mid2     | 2.48974778           |
| ENSMUSG00000016239 | Lonrf3   | 2.442990071          |
| ENSMUSG00000033855 | Ston1    | 2.427239553          |
| ENSMUSG00000035678 | Tnfsf9   | 2.18540581           |
| ENSMUSG00000052062 | Pard3b   | 1.901509966          |
| ENSMUSG00000029135 | Fosl2    | 1.834219505          |
| ENSMUSG00000025231 | Sufu     | 1.714252053          |
| ENSMUSG00000053477 | Tcf4     | 1.631977424          |
| ENSMUSG00000031342 | Gpm6b    | 1.624162789          |
| ENSMUSG00000038518 | Jarid2   | 1.595074557          |
| ENSMUSG00000036986 | Pml      | 1.584578904          |
| ENSMUSG00000027394 | Ttl      | 1.569198575          |
| ENSMUSG00000031642 | Sh3rf1   | 1.540609963          |
| ENSMUSG00000030557 | Mef2a    | 1.539563208          |
| ENSMUSG00000036959 | Bcor1    | 1.533549708          |
| ENSMUSG00000059005 | Hnrnpa3  | 1.531220914          |
| ENSMUSG00000022272 | Myo10    | 1.524470528          |
| ENSMUSG00000020716 | Nf1      | 1.518882534          |
| ENSMUSG00000022462 | Slc38a2  | 1.515038651          |
| ENSMUSG00000052155 | Acvr2a   | 1.494249438          |
| ENSMUSG00000022698 | Naa50    | 1.494238873          |
| ENSMUSG00000030265 | Kras     | 1.485442849          |
| ENSMUSG00000048796 | Cyb561d1 | 1.480012294          |
| ENSMUSG00000038679 | Trps1    | 1.476525682          |
| ENSMUSG00000052707 | Tnrc6a   | 1.46288146           |
| ENSMUSG00000054693 | Adam10   | 1.462129971          |
| ENSMUSG00000020612 | Prkar1a  | 1.455590762          |
| ENSMUSG00000028945 | Rheb     | 1.45360465           |
| ENSMUSG00000020780 | Srp68    | 1.444017874          |
| ENSMUSG00000020849 | Ywhae    | 1.442014059          |
| ENSMUSG00000015839 | Nfe2l2   | 1.436223028          |
| ENSMUSG00000062866 | Phactr2  | 1.433196872          |
| ENSMUSG00000045730 | Adrb2    | 1.425026996          |

|                    |               |             |
|--------------------|---------------|-------------|
| ENSMUSG00000027522 | Stx16         | 1.417934175 |
| ENSMUSG00000021109 | Hif1a         | 1.413589472 |
| ENSMUSG00000026464 | Zc3h11a       | 1.409026602 |
| ENSMUSG00000020134 | Peli1         | 1.390659016 |
| ENSMUSG00000059474 | Mbtd1         | 1.388926966 |
| ENSMUSG00000042349 | Ikbke         | 1.374892289 |
| ENSMUSG00000005371 | Fbxo11        | 1.367102012 |
| ENSMUSG00000040848 | Sft2d2        | 1.355026569 |
| ENSMUSG00000025583 | Rptor         | 1.354645351 |
| ENSMUSG00000047879 | Usp14         | 1.345762271 |
| ENSMUSG00000032688 | Malt1         | 1.345399894 |
| ENSMUSG00000033209 | Ttc28         | 1.343441062 |
| ENSMUSG00000016534 | Lamp2         | 1.332914831 |
| ENSMUSG00000024143 | Rhoq          | 1.332582239 |
| ENSMUSG00000069895 | Atxn11        | 1.331801472 |
| ENSMUSG00000027189 | Trim44        | 1.328798565 |
| ENSMUSG00000033610 | Pank1         | 1.325132572 |
| ENSMUSG00000006527 | Sfmbt1        | 1.323970264 |
| ENSMUSG00000032216 | Nedd4         | 1.321111964 |
| ENSMUSG00000052302 | Tbc1d30       | 1.320894342 |
| ENSMUSG00000042390 | Gatad2b       | 1.320015875 |
| ENSMUSG00000034560 | A230046K03Rik | 1.317313057 |
| ENSMUSG00000048787 | Dcun1d3       | 1.315573816 |
| ENSMUSG00000005871 | Apc           | 1.31373844  |
| ENSMUSG00000063663 | Brwd3         | 1.309838825 |
| ENSMUSG00000031309 | Rps6ka3       | 1.303179342 |
| ENSMUSG00000027351 | Spred1        | 1.300165448 |
| ENSMUSG00000032846 | Zswim6        | 1.298247907 |
| ENSMUSG00000073725 | Lmbrd1        | 1.288794784 |
| ENSMUSG00000028403 | Zdhhc21       | 1.283790153 |
| ENSMUSG00000048118 | Arid4a        | 1.282609173 |
| ENSMUSG00000025626 | Phf6          | 1.281033452 |
| ENSMUSG00000023927 | Satb1         | 1.280430032 |
| ENSMUSG00000027523 | Gnas          | 1.261838129 |
| ENSMUSG00000042599 | Kdm7a         | 1.258831269 |
| ENSMUSG00000049470 | Aff4          | 1.253888792 |
| ENSMUSG00000021377 | Dek           | 1.252301923 |
| ENSMUSG00000004994 | Ccdc130       | 1.250746955 |
| ENSMUSG00000034247 | Plekhm1       | 1.249459449 |
| ENSMUSG00000024095 | Hnrpl1        | 1.246636795 |
| ENSMUSG00000031016 | Wee1          | 1.245243301 |

|                    |        |             |
|--------------------|--------|-------------|
| ENSMUSG00000029684 | Wasl   | 1.245216518 |
| ENSMUSG00000047888 | Tnrc6b | 1.24465774  |
| ENSMUSG00000029004 | Mll5   | 1.243020466 |
| ENSMUSG00000021277 | Traf3  | 1.238129802 |
| ENSMUSG00000020918 | Kat2a  | 1.233963072 |
| ENSMUSG00000032413 | Rasa2  | 1.228470829 |
| ENSMUSG00000024969 | Mark2  | 1.223552546 |
| ENSMUSG00000022285 | Ywhaz  | 1.22078065  |
| ENSMUSG00000038342 | Mlxip  | 1.220723661 |
| ENSMUSG00000041528 | Rnf123 | 1.217797469 |
| ENSMUSG00000022663 | Atg3   | 1.21660915  |
| ENSMUSG00000029178 | Klf3   | 1.212518534 |
| ENSMUSG00000021488 | Nsd1   | 1.212306842 |
| ENSMUSG00000024241 | Sos1   | 1.208561735 |
| ENSMUSG00000037674 | Rfx7   | 1.20590725  |

**Supplemental Table S3, related to Figure 6. miR-155 targets in CD4<sup>+</sup> T cells from middle aged mice.**

| GeneID             | GeneName | Fold(DKO/WT) | Fold(155KO/WT) | Fold(146KO/WT) |
|--------------------|----------|--------------|----------------|----------------|
| ENSMUSG00000022272 | Myo10    | 2.331431916  | 2.455943208    | 1.040814644    |
| ENSMUSG00000052040 | Klf13    | 2.293345153  | 2.140585557    | 1.134085436    |
| ENSMUSG00000023927 | Satb1    | 1.753170089  | 2.119641237    | -2.123911717   |
| ENSMUSG00000056493 | Foxk1    | 2.122844505  | 2.049143189    | 1.177268668    |
| ENSMUSG00000047712 | Ust      | 1.357459015  | 2.030804131    | -2.009690169   |
| ENSMUSG00000039087 | Rreb1    | 1.990078721  | 2.003146727    | 1.00555831     |
| ENSMUSG00000029135 | Fosl2    | 1.810604192  | 1.938201454    | 1.163551873    |
| ENSMUSG00000048796 | Cyb561d1 | 1.6461751    | 1.806782568    | 1.183826453    |
| ENSMUSG00000037896 | Rcor1    | 1.616575625  | 1.734108057    | 1.063441255    |
| ENSMUSG00000045730 | Adrb2    | 1.476483874  | 1.733787336    | -1.358271346   |
| ENSMUSG00000020918 | Kat2a    | 1.460721661  | 1.714166146    | 1.050074461    |
| ENSMUSG00000018076 | Med13l   | 1.736410739  | 1.707203809    | -1.018280643   |
| ENSMUSG00000041235 | Chd7     | 1.402127263  | 1.683182605    | -1.152584937   |
| ENSMUSG00000029196 | Tada2b   | 1.624537222  | 1.682953948    | 1.095369352    |
| ENSMUSG00000035696 | Rnf38    | 1.591433584  | 1.602117389    | 1.119839481    |
| ENSMUSG00000020593 | Lpin1    | 1.612429519  | 1.577333363    | -1.106345796   |
| ENSMUSG00000015839 | Nfe2l2   | 1.210530643  | 1.575118642    | -1.171658912   |
| ENSMUSG00000042349 | Ikbke    | 1.448399717  | 1.569226387    | 1.093022947    |
| ENSMUSG00000025026 | Add3     | 1.395044227  | 1.549231703    | -1.27170831    |
| ENSMUSG00000042599 | Kdm7a    | 1.308522127  | 1.545562365    | -1.171988595   |
| ENSMUSG00000031137 | Fgf13    | 1.268552229  | 1.537266242    | -1.184140386   |
| ENSMUSG00000041961 | Znrf3    | 1.616055561  | 1.534306839    | -1.554512481   |
| ENSMUSG00000020134 | Peli1    | 1.300818987  | 1.53384283     | 1.08185986     |
| ENSMUSG00000031309 | Rps6ka3  | 1.667626554  | 1.53208449     | -1.05203863    |
| ENSMUSG00000020198 | Ap3d1    | 1.448209079  | 1.511043926    | 1.02235682     |
| ENSMUSG00000029016 | Cln6     | 1.548078619  | 1.5039673      | 1.092543915    |
| ENSMUSG00000024642 | Tle4     | 1.376390815  | 1.503573027    | -1.193613766   |
| ENSMUSG00000006585 | Cdt1     | 1.476242162  | 1.474086413    | 1.111798415    |
| ENSMUSG00000020941 | Map3k14  | 1.382172615  | 1.467698363    | -1.475561447   |
| ENSMUSG00000026464 | Zc3h11a  | 1.262214148  | 1.463216684    | 1.115516876    |
| ENSMUSG00000003382 | Etv3     | 1.24487937   | 1.44431808     | -1.309482391   |
| ENSMUSG00000027394 | Ttl      | 1.390026705  | 1.442646129    | 1.071066102    |
| ENSMUSG00000022387 | Brd1     | 1.28245713   | 1.430638627    | -1.12757029    |
| ENSMUSG00000026361 | Cdc73    | 1.396501729  | 1.42101281     | 1.135182151    |
| ENSMUSG00000025612 | Bach1    | 1.32784858   | 1.420055711    | -1.165951833   |
| ENSMUSG00000027522 | Stx16    | 1.29407602   | 1.418086661    | 1.181498092    |
| ENSMUSG00000049470 | Aff4     | 1.325354751  | 1.396103288    | -1.127437649   |
| ENSMUSG00000078515 | Ddi2     | 1.299912982  | 1.390122576    | 1.06998946     |
| ENSMUSG00000026288 | Inpp5d   | 1.327572886  | 1.387980068    | 1.170072496    |

|                    |          |             |             |              |
|--------------------|----------|-------------|-------------|--------------|
| ENSMUSG00000025583 | Rptor    | 1.53709262  | 1.381652415 | 1.120688701  |
| ENSMUSG00000051675 | Trim32   | 1.216310022 | 1.37186213  | -1.07658812  |
| ENSMUSG00000045005 | Fzd5     | 1.205762729 | 1.363341439 | 1.118656148  |
| ENSMUSG00000021277 | Traf3    | 1.287966483 | 1.357344162 | 1.151881702  |
| ENSMUSG00000003882 | Il7r     | 1.204859507 | 1.352716094 | -1.289626916 |
| ENSMUSG00000021488 | Nsd1     | 1.337974138 | 1.345900558 | 1.024598788  |
| ENSMUSG00000001280 | Sp1      | 1.341300231 | 1.341849323 | 1.176540669  |
| ENSMUSG00000026335 | Pam      | 1.434857733 | 1.328979776 | 1.157721514  |
| ENSMUSG00000037926 | Ssh2     | 1.24064617  | 1.324864274 | -1.091289633 |
| ENSMUSG00000069895 | Atxn11   | 1.489072946 | 1.318525104 | 1.196667726  |
| ENSMUSG00000003345 | Csnk1g2  | 1.316242673 | 1.313048922 | -1.006804118 |
| ENSMUSG00000026028 | Trak2    | 1.344302542 | 1.30566628  | 1.015419713  |
| ENSMUSG00000039615 | Stub1    | 1.308449442 | 1.29151876  | 1.017423574  |
| ENSMUSG00000037824 | Tspan14  | 1.299464346 | 1.287960207 | -1.443989648 |
| ENSMUSG00000057230 | Aak1     | 1.22066489  | 1.278568247 | -1.13042255  |
| ENSMUSG00000094483 | Purb     | 1.224462143 | 1.277469857 | 1.105740188  |
| ENSMUSG00000074748 | Atxn7l3b | 1.244765112 | 1.277197045 | 1.039735064  |
| ENSMUSG00000040848 | Sft2d2   | 1.365935348 | 1.275904191 | -1.000255111 |
| ENSMUSG00000032846 | Zswim6   | 1.230379047 | 1.274611604 | 1.144202253  |
| ENSMUSG00000043411 | Usp48    | 1.209453565 | 1.274201552 | 1.067266717  |
| ENSMUSG00000032035 | Ets1     | 1.247165375 | 1.258059678 | -1.09858344  |
| ENSMUSG00000033237 | Arid2    | 1.317316892 | 1.24794774  | -1.054503717 |
| ENSMUSG00000055200 | Sertad3  | 1.312583043 | 1.238857869 | 1.11202553   |
| ENSMUSG00000074221 | Zfp568   | 1.225266054 | 1.216741478 | -1.359511608 |



**Supplemental Table S4, related to Figure 6. shRNA targeting sequences and  
quantitative PCR (qPCR) Primers.**

| <b>Gene</b> | <b>Targeting sequence</b>      |                                |
|-------------|--------------------------------|--------------------------------|
| Fosl2       | TCCTAGTGAGCTTCCTTTCTT          |                                |
| Peli1       | ACGGTGGTGGTTGAATATACT          |                                |
| <b>Gene</b> | <b>Forward Primer Sequence</b> | <b>Reverse Primer Sequence</b> |
| BCL6        | CCTGTGAAATCTGTGGCACTCG         | CGCAGTTGGCTTTTGTGACG           |
| CXCR5       | GACCTTCAACCGTGCCTTTCTC         | GAACTTGCCCTCAGTCTGTAATCC       |
| IL21        | GCTCCACAAGATGTAAAGGGGC         | CCACGAGGTCAATGATGAATGTC        |
| ICOS        | CAGGAGAAATCAATGGCTCGG          | TTGGTCTTGGTGAGTTCGCAG          |
| NFE2L2      | TAGATGACCATGAGTCGCTTGC         | GCCAAACTTGCTCCATGTCC           |
| RPTOR       | TTTGTCTACGACTGTTCCAATGC        | GCTACCTCTAGTTCCTGCTCC          |
| FOSL2       | CCAGCAGAAGTTCCGGGTAG           | GTAGGGATGTGAGCGTGGATA          |
| PELI1       | GCCCCAGTAAAATATGGCGAA          | CCCCATTTGCCTTAGGTCTTT          |
| L32         | AAGCGAAACTGGCGGAAAC            | TAACCGATGTTGGGCATCAG           |
